# Supplementary material
Source: ML conference proceedings conference paper supplement (https://proceedings.mlr.press/v28/grunewalder13.html)
Supplement: Supplementary file 1 [file grunewalder13-supp.pdf]

# SUPPLEMENTARY

## A. Section 2: Smooth Operators – Supplementary Results

### A.1. On the Relation between the Natural and Surrogate Risk

We follow up on the discussion in Section 2.2 about the surrogate and natural risk. The surrogate risk itself is not a quantity we really care about, it is only an upper bound that makes optimisation feasible. In general, we have that upper bounds similar to the one we derived in Section 2.2 are loose. For the conditional expectation estimates in Section 3.2, for example, the upper bound corresponds to something like the variance of the underlying distribution at points  $x$  and might be arbitrarily high for all estimates, while the natural risk can be decreased to zero with a reasonable estimator. Yet, the situation is not as grim as it seems. The reason for this is that the positions of the minimisers are often closely related, i.e. a minimum of the surrogate risk is in certain cases also a minimum of the natural risk. More generally, the minima often do not overlap exactly, but due to some continuity properties they are not located too far apart and we suffer only a minor penalty compared to the true minimiser by using the surrogate minimiser.

Why this is the case is easy to see for the setting in Section 3.2. If we are in the lucky situation that  $\mathbf{X}(x)$  can be represented by a  $\mathbf{G}^*k(x, \cdot)$  then this  $\mathbf{G}^*k(x, \cdot)$  is the minimiser for both the upper bound and the natural risk function. Furthermore, the bound becomes tight as the surrogate risk can be minimised to zero. If we can not represent  $\mathbf{X}(x)$  exactly then the surrogate risk minimises the difference to  $\mathbf{X}(x)$  and the natural risk is bounded by this approximation error.

Usually, we have a variation of the risk functions of Section 2.2 and relating the minimisers becomes more complicated. The problem of relating the risk functions is an important one and it is useful to have a rather general way to link these risk functions. One such approach is to use conditional expectations where we condition wrt. a  $\sigma$ -algebra  $\Sigma$  (Fremlin, 2001)[Chp. 233]. It is well known that such conditional expectations are in a suitable sense  $L^2$  minimisers over all  $\Sigma$ -measurable functions (Fremlin, 2001)[244N]. Our setting is a bit more complicated then the standard  $L^2$  setting, but, intuitively, if we can find a suitable  $\Sigma$  such that the conditional expectation wrt.  $\Sigma$  is a solution for both the natural and the surrogate risk and if the class of  $\Sigma$ -measurable functions overlaps with the functions we can represent with  $\mathbf{G}^*k(x, \cdot)$  then we know that the minimisers are co-located. We use this argument in a form adapted to our setting for kernelized approximate Bayesian inference and the simple conditional expectation  $\mathbb{E}[\cdot | x]$  to relate the risk functions.

### A.2. Reproducing Kernel

We verify here that  $\Xi$  is a valid reproducing kernel. We use the criterion from Carmeli et al. (2006)[Prop.1] to verify this. The criterion resembles the positive-definiteness of a scalar valued kernel. The criterion is fulfilled, if  $\Xi(f, g) \in L(\mathcal{H}_Y)$  (which is fulfilled as  $\Xi(f, g) = c\mathbf{B}$ , for a  $c \in \mathbb{R}$ ) and for all  $n \in \mathbb{N}$ ,  $\{c_i\}_{i=1}^n$ ,  $c_i \in \mathbb{R}$ ,  $\{f_i\}_{i=1}^n$ ,  $f_i \in \mathcal{H}_X$ , and all  $h \in \mathcal{H}_Y$  it holds that

$$\sum_{i=1}^n \sum_{j=1}^n c_i c_j \langle \Xi(f_i, f_j) h, h \rangle_l = \left\langle \sum_{i=1}^n c_i f_i, \mathbf{A} \sum_{i=1}^n c_i f_i \right\rangle_k \langle \mathbf{B} h, h \rangle_l = \left\| \sum_{i=1}^n \mathbf{A}^{1/2} c_i f_i \right\|_k^2 \left\| \mathbf{B}^{1/2} h \right\|_l^2$$

is greater than zero. This is obviously fulfilled and  $\Xi$  has an associated RKHS  $\mathcal{H}_\Xi$ .

### A.3. Case Study III: Smooth Quotient Operators

Analogously to multiplication one can derive an operator for forming quotients,  $f/g \approx \mathbf{Q}f$ , where  $f \in \mathcal{H}_X$  and  $g(x) \neq 0$  for all  $x$ . In the unconstrained case we can find a suitable operator  $\mathbf{X}$  by using eq. 1 with  $\mathbf{X}(x) := \frac{k(x, \cdot)}{g(x)}$ , which is in  $\mathcal{H}_X$  for a given  $x$ , is a valid choice. The approximation is hence

$$\mathbf{Q}f = \sum_{i=1}^n \sum_{j=1}^n \frac{f(x_j)}{g(x_j)} \mathbf{W}_{ij} k(x_i, \cdot), \text{ with } \mathbf{W} = (\mathbf{K} + \lambda \mathbf{I})^{-1}.$$

## B. Section 2: Smooth Operators – Proofs

**Theorem B.1.** Each  $\mathbf{F} \in \mathcal{H}_\Xi$  is a bounded linear operator from  $\mathcal{H}_X$  to  $\mathcal{H}_Y$ .

*Proof.* (a) Each operator in  $\mathcal{L} = \{\sum_{i=1}^n \Xi(f_i, \cdot) h_i : n \in \mathbb{N}, f_i \in \mathcal{H}_X, h_i \in \mathcal{H}_Y\}$  linear as

$$\mathbf{F}[af + bg] = \sum_{i=1}^n \langle af + bg, \mathbf{A}f_i \rangle_k \mathbf{B}h_i = a \sum_{i=1}^n \langle f, \mathbf{A}f_i \rangle_k \mathbf{B}h_i + b \sum_{i=1}^n \langle g, \mathbf{A}f_i \rangle_k \mathbf{B}h_i = a\mathbf{F}f + b\mathbf{F}g.$$

(b) Also each operator in  $\mathcal{H}_\Xi = \text{clos } \mathcal{L}$  is linear – see, for example, the proof of Prop. 1 in Carmeli et al. (2006) for the equivalence of the closure of  $\mathcal{L}$  and  $\mathcal{H}_\Xi$ .

**P** Since  $\mathcal{L}$  is dense we can find for each  $\epsilon > 0$  and  $\mathbf{F} \in \mathcal{H}_\Xi$  an operator  $\mathbf{F}_\delta \in \mathcal{L}$  such that  $\|\mathbf{F} - \mathbf{F}_\delta\|_\Xi < \delta$ . We have for an arbitrary  $g \in \mathcal{H}_X$  that

$$\begin{aligned} \|\mathbf{F}g - \mathbf{F}_\delta g\|_l &= \|(\mathbf{F} - \mathbf{F}_\delta)g\|_l \leq \|\mathbf{F} - \mathbf{F}_\delta\|_\Xi \|\Xi(g, g)\|_{\text{op}}^{1/2} = \|\mathbf{F} - \mathbf{F}_\delta\|_\Xi \|\mathbf{A}^{1/2}g\|_k \|\mathbf{B}\|_{\text{op}}^{1/2} \\ &\leq \|\mathbf{F} - \mathbf{F}_\delta\|_\Xi \|\mathbf{A}^{1/2}\|_{\text{op}} \|\mathbf{B}\|_{\text{op}}^{1/2} \|g\|_k, \end{aligned}$$

where we used Prop 2.1 (f) from Micchelli & Pontil (2005) for the first inequality and the positivity and self-adjointness of  $\mathbf{A}$  and  $\mathbf{B}$  to guarantee the existence of square-roots. As  $\mathbf{A}, \mathbf{B}$  are bounded we can pick for a given  $g$  a  $\delta$  such that  $\|\mathbf{F}g - \mathbf{F}_\delta g\|_l < \epsilon$ .

Now, we can also pick a  $\delta$  such that  $\|\mathbf{F}[af + bg] - \mathbf{F}_\delta[af + bg]\|_k, \|a\mathbf{F}f - a\mathbf{F}_\delta f\|_k$  and  $\|b\mathbf{F}g - b\mathbf{F}_\delta g\|_k$  are simultaneously smaller than  $\epsilon/3$ .

Hence, for a given  $\epsilon$  we have a  $\mathbf{F}_\epsilon$  such that

$$\|\mathbf{F}[af + bg] - a\mathbf{F}f - b\mathbf{F}g\|_k \leq \|\mathbf{F}[af + bg] - \mathbf{F}_\epsilon[af + bg]\|_k + \|a\mathbf{F}_\epsilon f + b\mathbf{F}_\epsilon g - a\mathbf{F}f - b\mathbf{F}g\|_k \leq \epsilon.$$

Since this holds for every  $\epsilon > 0$  we have that  $\|\mathbf{F}[af + bg] - a\mathbf{F}f - b\mathbf{F}g\|_k = 0$  and  $\mathbf{F}[af + bg] = a\mathbf{F}f + b\mathbf{F}g$ , i.e.  $\mathbf{F}$  is linear. **Q**

(c) Each  $\mathbf{F}$  maps into  $\mathcal{H}_Y$ . This is implicitly in Th. 2.1 from (Micchelli & Pontil, 2005), but is also easy to derive: we want to show that  $\mathbf{F}f \in \mathcal{H}_Y$ . We know this holds for any  $\mathbf{F}' \in \mathcal{L}$  and we can for any  $\mathbf{F} \in \mathcal{H}_\Xi$  find a sequence  $\{\mathbf{F}_n\}_{n=1}^\infty$  in  $\mathcal{L}$  that converges to  $\mathbf{F}$ , and is hence a Cauchy sequence. Now, as  $\mathcal{H}_Y$  is complete it is sufficient for convergence to show that for a given  $f \in \mathcal{H}_X$ ,  $\mathbf{F}_n f$  is a Cauchy sequence. Similarly, like in (b), we have

$$\|\mathbf{F}_n f - \mathbf{F}_m f\|_l \leq \|\mathbf{F}_n - \mathbf{F}_m\|_\Xi \|\Xi(f, f)\|_{\text{op}}^{1/2}.$$

Since  $\Xi(f, f)$  is a bounded operator we have shown that  $\{\mathbf{F}_n f\}_{n=1}^\infty$  is a Cauchy sequence in  $\mathcal{H}_Y$  and has hence a limit  $\tilde{\mathbf{F}}f$  in  $\mathcal{H}_Y$ . We have

$$\|\tilde{\mathbf{F}}f - \mathbf{F}f\|_l \leq \|\tilde{\mathbf{F}}f - \mathbf{F}_n f\|_l + \|\mathbf{F}_n - \mathbf{F}\|_\Xi \|\Xi(f, f)\|_{\text{op}}^{1/2}.$$

Since  $\mathbf{F}_n f$  converges to  $\tilde{\mathbf{F}}f$  in  $\mathcal{H}_Y$  and  $\mathbf{F}_n$  converges to  $\mathbf{F}$  in  $\mathcal{H}_\Xi$  we have that  $\tilde{\mathbf{F}}f = \mathbf{F}f \in \mathcal{H}_Y$ .

(d) Finally, each  $\mathbf{F}$  is bounded as an operator from  $\mathcal{H}_X$  to  $\mathcal{H}_Y$  as

$$\|\mathbf{F}f\|_l \leq \|\mathbf{F}\|_\Xi \|\Xi(f, f)\|_{\text{op}}^{1/2} = \|\mathbf{F}\|_\Xi \|\langle f, \mathbf{A}f \rangle_k \mathbf{B}\|_{\text{op}}^{1/2} \leq \|\mathbf{F}\|_\Xi \|\mathbf{A}^{1/2}\|_{\text{op}} \|f\|_k \|\mathbf{B}\|_{\text{op}}^{1/2} \leq C \|f\|_k.$$

□

**Theorem B.2.** If for  $\mathbf{F}, \mathbf{G} \in \mathcal{H}_\Xi$  and all  $x \in X$  it holds that  $\mathbf{F}k(x, \cdot) = \mathbf{G}k(x, \cdot)$  then  $\mathbf{F} = \mathbf{G}$ . Furthermore, if  $k(x, \cdot)$  is continuous in  $x$  then it is sufficient that  $\mathbf{F}k(x, \cdot) = \mathbf{G}k(x, \cdot)$  on a dense subset of  $X$ .

*Proof.* As  $\mathbf{F}$  and  $\mathbf{G}$  are continuous it follows that they are uniquely defined by their values on the dense subset  $\mathcal{L}_X$  of  $\mathcal{H}_X$ . Now, let  $f = \sum_{i=1}^n \alpha_i k(x_i, \cdot)$  be an arbitrary element in  $\mathcal{L}_X$  then  $\mathbf{F}f = \sum_{i=1}^n \alpha_i \mathbf{F}k(x_i, \cdot)$  and  $\mathbf{F}f = \mathbf{G}f$  if  $\mathbf{F}k(x, \cdot) = \mathbf{G}k(x, \cdot)$  for all  $x \in X$ . This proves the first statement.

Now, assume that we only know that both operators are equal on a dense set  $\mathcal{D}$  of  $X$ . Take an arbitrary  $x \in X$ . There exists a sequence  $\{x_j\}_{j=1}^\infty$  in  $\mathcal{D}$  converging to  $x$ . We have that  $\mathbf{F}k(x, \cdot) = \mathbf{F} \lim_{n \rightarrow \infty} k(x_n, \cdot) = \lim_{n \rightarrow \infty} \mathbf{F}k(x_n, \cdot) = \lim_{n \rightarrow \infty} \mathbf{G}k(x_n, \cdot) = \mathbf{G}k(x, \cdot)$  and both operators are equal on all  $k(x, \cdot)$ . □

**Theorem B.3.** For every  $\mathbf{F} \in \mathcal{H}_{\Xi}$  there exists an adjoint  $\mathbf{F}^*$  in  $\mathcal{H}_{\Xi^*}$  such that for all  $f \in \mathcal{H}_X$  and  $h \in \mathcal{H}_Y$

$$\langle \mathbf{F}f, h \rangle_l = \langle f, \mathbf{F}^*h \rangle_k.$$

In particular, we have for  $\mathbf{F}f = \sum_{i=1}^n \Xi_{f_i}[h_i](f) = \sum_{i=1}^n \langle f, \mathbf{A}f_i \rangle_k \mathbf{B}h_i$  that the adjoint is

$$(\mathbf{T}\mathbf{F})h = \mathbf{F}^*h = \sum_{i=1}^n \Xi_{h_i}^*[f_i](h) = \sum_{i=1}^n \langle h, \mathbf{B}h_i \rangle_l \mathbf{A}f_i.$$

The operator  $\mathbf{T}\mathbf{F} = \mathbf{F}^*$  is an isometric isomorphism from  $\mathcal{H}_{\Xi}$  to  $\mathcal{H}_{\Xi^*}$  ( $\mathcal{H}_{\Xi} \cong \mathcal{H}_{\Xi^*}$  and  $\|\mathbf{F}\|_{\Xi} = \|\mathbf{F}^*\|_{\Xi^*}$ ).

*Proof.* (a) We first derive the explicit expression of  $\mathbf{F}^*$  for  $\mathbf{F} \in \mathcal{L}$ . This is nearly trivial, we have

$$\langle \mathbf{F}f, h \rangle_l = \sum_{i=1}^n \langle f, \mathbf{A}f_i \rangle_k \langle h_i, \mathbf{B}h \rangle_l = \sum_{i=1}^n \langle h_i, \mathbf{B}h \rangle_l \langle f, \mathbf{A}f_i \rangle_k = \langle f, \sum_{i=1}^n \langle h, \mathbf{B}h_i \rangle_l \mathbf{A}f_i \rangle_k = \langle f, \mathbf{F}^*h \rangle_k.$$

(b) Next, we verify some properties of  $(\mathbf{T} \upharpoonright \mathcal{L})$ , where  $(\mathbf{T} \upharpoonright \mathcal{L})[\sum_{i=1}^n \Xi_{f_i} h_i] = \sum_{i=1}^n \Xi_{h_i}^* f_i$ . (i)  $(\mathbf{T} \upharpoonright \mathcal{L})$  is linear as

$$\begin{aligned} (\mathbf{T} \upharpoonright \mathcal{L})[a\mathbf{F} + b\mathbf{G}] &= (\mathbf{T} \upharpoonright \mathcal{L})[\sum_{i=1}^n \Xi_{f_i} a h_i + \sum_{j=1}^m \Xi_{g_j} b u_j] = \sum_{i=1}^n \Xi_{a h_i}^* f_i + \sum_{j=1}^m \Xi_{b u_j}^* g_j \\ &= a \sum_{i=1}^n \langle \cdot, \mathbf{B}h_i \rangle_l \mathbf{A}f_i + b \sum_{j=1}^m \langle \cdot, \mathbf{B}u_j \rangle_l \mathbf{A}g_j = a(\mathbf{T} \upharpoonright \mathcal{L})\mathbf{F} + b(\mathbf{T} \upharpoonright \mathcal{L})\mathbf{G}. \end{aligned}$$

where we used that  $\Xi_u$  is a linear operator. (ii)  $(\mathbf{T} \upharpoonright \mathcal{L})$  is norm preserving, as

$$\begin{aligned} \|(\mathbf{T} \upharpoonright \mathcal{L})\mathbf{F}\|_{\Xi^*}^2 &= \sum_{i=1}^n \sum_{j=1}^n \langle \Xi_{h_i}^*[f_i], \Xi_{h_j}^*[f_j] \rangle_{\Xi^*} = \sum_{i=1}^n \sum_{j=1}^n \langle f_i, \Xi^*(h_i, h_j) f_j \rangle_k \\ &= \sum_{i=1}^n \sum_{j=1}^n \langle h_i, \mathbf{B}h_j \rangle_l \langle f_i, \mathbf{A}f_j \rangle_k = \sum_{i=1}^n \sum_{j=1}^n \langle h_i, \Xi(f_i, f_j) h_j \rangle_l = \|\mathbf{F}\|_{\Xi}^2. \end{aligned}$$

Furthermore,  $(\mathbf{T} \upharpoonright \mathcal{L})$  is continuous as  $\|(\mathbf{T} \upharpoonright \mathcal{L})\|_{\text{op}} = \sup_{\mathbf{F} \in \mathcal{L}, \|\mathbf{F}\|_{\Xi}=1} \|(\mathbf{T} \upharpoonright \mathcal{L})\mathbf{F}\|_{\Xi^*} = \sup_{\mathbf{F} \in \mathcal{L}, \|\mathbf{F}\|_{\Xi}=1} \|\mathbf{F}\|_{\Xi} = 1$ . (iii)  $(\mathbf{T} \upharpoonright \mathcal{L})$  is bijective. Take an arbitrary  $\mathbf{G} \in \mathcal{L}^*$  then  $\mathbf{G} = \sum_{i=1}^n \Xi_{h_i}^*[f_i]$  for suitable choices of  $n, f_i, h_i$ . We have that  $(\mathbf{T} \upharpoonright \mathcal{L})[\sum_{i=1}^n \Xi_{f_i} h_i] = \mathbf{G}$  and, hence,  $(\mathbf{T} \upharpoonright \mathcal{L})$  is surjective.  $(\mathbf{T} \upharpoonright \mathcal{L})$  is also injective, take  $\mathbf{F}, \mathbf{F}'$  such that  $(\mathbf{T} \upharpoonright \mathcal{L})\mathbf{F} = (\mathbf{T} \upharpoonright \mathcal{L})\mathbf{F}'$  then, we have

$$\|\mathbf{F} - \mathbf{F}'\|_{\Xi} = \|(\mathbf{T} \upharpoonright \mathcal{L})[\mathbf{F} - \mathbf{F}']\|_{\Xi^*} = \|(\mathbf{T} \upharpoonright \mathcal{L})\mathbf{F} - (\mathbf{T} \upharpoonright \mathcal{L})\mathbf{F}'\|_{\Xi^*} = 0,$$

as  $(\mathbf{T} \upharpoonright \mathcal{L})$  is norm preserving and we conclude  $\mathbf{F} = \mathbf{F}'$ .

(c) As  $\mathcal{L}$  is dense and  $(\mathbf{T} \upharpoonright \mathcal{L})$  a bounded linear operator from  $\mathcal{L}$  to  $\mathcal{H}_{\Xi^*}$  there exists a unique continuous extension  $\mathbf{T} : \mathcal{H}_{\Xi} \mapsto \mathcal{H}_{\Xi^*}$  of  $(\mathbf{T} \upharpoonright \mathcal{L})$  (Werner, 2002)[Satz II.1.5]. Furthermore,  $\|\mathbf{T}\|_{\text{op}} = \|(\mathbf{T} \upharpoonright \mathcal{L})\|_{\text{op}} = 1$ .

We verify again a couple of properties. (i)  $\mathbf{T}$  is injective. **P** Assume that for  $\mathbf{F}, \mathbf{G} \in \mathcal{H}_{\Xi}$  it holds that  $\mathbf{F} \neq \mathbf{G}$  and  $\mathbf{T}\mathbf{F} = \mathbf{T}\mathbf{G}$ . As  $\mathbf{F} \neq \mathbf{G}$  we have that  $\|\mathbf{F} - \mathbf{G}\|_{\Xi^*} > \epsilon$  for an  $\epsilon > 0$ . Now, as  $\mathbf{T}$  is continuous it is also uniformly continuous and there exists for arbitrary  $\eta > 0$  a  $\delta > 0$  such that for all  $\mathbf{H}$  it holds that  $\|\mathbf{T}\mathbf{H} - \mathbf{T}\mathbf{H}_{\eta}\|_{\Xi^*} < \eta$ , whenever  $\|\mathbf{H} - \mathbf{H}_{\eta}\|_{\Xi} < \delta$ . In the following we use  $\eta = \epsilon/6$  and we denote the associated  $\delta$  with  $\delta_{\epsilon/6}$ .

For  $\mathbf{F}', \mathbf{G}' \in \mathcal{L}$  we have that

$$\|\mathbf{T}\mathbf{F}' - \mathbf{T}\mathbf{G}'\|_{\Xi^*} = \|\mathbf{F}' - \mathbf{G}'\|_{\Xi} = \|\mathbf{F}' - \mathbf{F} + \mathbf{F} - \mathbf{G} + \mathbf{G} - \mathbf{G}'\|_{\Xi} \geq \|\mathbf{F} - \mathbf{G}\|_{\Xi} - \|\mathbf{F}' - \mathbf{F} + \mathbf{G} - \mathbf{G}'\|_{\Xi}.$$

As  $\mathcal{L}$  is dense, we can pick  $\mathbf{F}'$  and  $\mathbf{G}'$  such that  $\|\mathbf{F}' - \mathbf{F}\|_{\Xi}, \|\mathbf{G} - \mathbf{G}'\|_{\Xi} < \min\{\epsilon/6, \delta_{\epsilon/6}\}$ . Hence,  $\|\mathbf{F}' - \mathbf{F} + \mathbf{G} - \mathbf{G}'\|_{\Xi} \leq \|\mathbf{F}' - \mathbf{F}\|_{\Xi} + \|\mathbf{G} - \mathbf{G}'\|_{\Xi} < \epsilon/3$  and, consequently, that  $\|\mathbf{T}\mathbf{F}' - \mathbf{T}\mathbf{G}'\|_{\Xi^*} > 2/3\epsilon$ .

Furthermore,  $\|\mathbf{T}\mathbf{F} - \mathbf{T}\mathbf{F}'\|_{\Xi^*}, \|\mathbf{T}\mathbf{G}' - \mathbf{T}\mathbf{G}\|_{\Xi^*} < \epsilon/6$  and we have

$$\|\mathbf{T}\mathbf{F} - \mathbf{T}\mathbf{G}\|_{\Xi^*} \geq \|\mathbf{T}\mathbf{F} - \mathbf{T}\mathbf{F}'\|_{\Xi^*} - \|\mathbf{T}\mathbf{F}' - \mathbf{T}\mathbf{G}'\|_{\Xi^*} + \|\mathbf{T}\mathbf{G}' - \mathbf{T}\mathbf{G}\|_{\Xi^*} > 1/3 > 0$$

and  $\mathbf{F} \neq \mathbf{G}$ . **Q**

(ii)  $\mathbf{T}$  is surjective, and hence bijective. **P** Consider an arbitrary  $\mathbf{G} \in \mathcal{H}_{\Xi^*}$  and chose a sequence  $\{\mathbf{G}_n\}_{n=1}^{\infty}$  in  $\mathcal{L}^*$  converging to  $\mathbf{G}$ . Now, we have exactly one  $\mathbf{F}_n \in \mathcal{L}$  such that  $\mathbf{T}\mathbf{F}_n = \mathbf{G}_n$ . As  $\{\mathbf{G}_n\}_{n=1}^{\infty}$  is a Cauchy-sequence, it follows that  $\{\mathbf{F}_n\}_{n=1}^{\infty}$  is also a Cauchy-sequence:

$$\|\mathbf{F}_n - \mathbf{F}_m\|_{\Xi} = \|\mathbf{T}\mathbf{F}_n - \mathbf{T}\mathbf{F}_m\|_{\Xi^*} = \|\mathbf{G}_n - \mathbf{G}_m\|_{\Xi^*}$$

and because of the completeness of  $\mathcal{H}_{\Xi}$  the sequence  $\{\mathbf{F}_n\}_{n=1}^{\infty}$  has a limit  $\mathbf{F}$ .

Because of the continuity of  $\mathbf{T}$  it follows that

$$\mathbf{G} = \lim_{n \rightarrow \infty} \mathbf{T}\mathbf{F}_n = \mathbf{T}\mathbf{F}$$

and  $\mathbf{T}$  is surjective. **Q**

(iii)  $\mathbf{T}$  has a continuous inverse  $\mathbf{T}^{-1}$ . That follows from an application of the open mapping theorem, e.g. Kor.IV.3.4 in [Werner \(2002\)](#).

(iv)  $\mathbf{T}$  is norm preserving. For an arbitrary  $\mathbf{F} \in \mathcal{H}_{\Xi}$  pick a sequence  $\{\mathbf{F}_n\}_{n=1}^{\infty}$  in  $\mathcal{L}$  that converges to it. Then

$$\|\mathbf{T}\mathbf{F}\|_{\Xi^*} = \|\lim_{n \rightarrow \infty} \mathbf{T}\mathbf{F}_n\|_{\Xi^*} = \lim_{n \rightarrow \infty} \|\mathbf{T}\mathbf{F}_n\|_{\Xi^*} = \lim_{n \rightarrow \infty} \|\mathbf{F}_n\|_{\Xi} = \|\mathbf{F}\|_{\Xi}$$

as  $\mathbf{T}$  is continuous and preserves the norm for elements in  $\mathcal{L}$ .

(v) That  $\mathbf{T}$  maps to the adjoint can be seen in a similar way. For an arbitrary  $\mathbf{F} \in \mathcal{H}_{\Xi}$  pick a sequence  $\{\mathbf{F}_n\}_{n=1}^{\infty}$  in  $\mathcal{L}$  that converges to it. Then

$$\langle \mathbf{F}f, h \rangle_k = \lim_{n \rightarrow \infty} \langle \mathbf{F}_n f, h \rangle_k = \lim_{n \rightarrow \infty} \langle f, \mathbf{T}\mathbf{F}_n h \rangle_l = \langle f, \mathbf{T}\mathbf{F}h \rangle_l$$

as  $\mathbf{T}$  is continuous and maps to the adjoint for elements in  $\mathcal{L}$ . □

**Theorem B.4.** *The set of self-adjoint operators in  $\mathcal{H}_{\Xi}$  is a closed linear subspace.*

*Proof.* The set is a linear subspace as for two self-adjoint operators  $\mathbf{F}, \mathbf{G}$ , scalar  $a, b$  and arbitrary  $f, g \in \mathcal{H}_X$  it holds that

$$\langle (a\mathbf{F} + b\mathbf{G})f, g \rangle_k = a\langle \mathbf{F}f, g \rangle_k + b\langle \mathbf{G}f, g \rangle_k = \langle f, (a\mathbf{F} + b\mathbf{G})g \rangle_k.$$

The subspace is closed. To see this let  $\mathbf{F}$  be a limit of a sequence  $\{\mathbf{F}_n\}_{n=1}^{\infty}$  of self-adjoint operators. For a given  $f, g \in \mathcal{H}_X$  we have that

$$|\langle \mathbf{F}f, g \rangle_k - \langle \mathbf{F}_n f, g \rangle_k| \leq \|(\mathbf{F} - \mathbf{F}_n)f\|_k \|g\|_k \leq \|\mathbf{F} - \mathbf{F}_n\|_{\Xi} \|\Xi(f, f)\|_{op}^{1/2} \|g\|_k$$

and, as the operator  $\Xi(f, f)$  is bounded there exists for any upper bound  $\epsilon > 0$  of the right side a  $N$  such that for all  $n \geq N$  we have that  $|\langle \mathbf{F}f, g \rangle_k - \langle \mathbf{F}_n f, g \rangle_k| < \epsilon$ .

Using this we have that for arbitrary  $f, g$

$$\langle \mathbf{F}f, g \rangle_k = \lim_{n \rightarrow \infty} \langle \mathbf{F}_n f, g \rangle_k = \lim_{n \rightarrow \infty} \langle f, \mathbf{F}_n g \rangle_k = \langle f, \mathbf{F}g \rangle_k$$

and  $\mathbf{F}$  is also self-adjoint. □

## C. Section 3: RKHS Integration Theory: Basic Transformations – Supplementary Results

### C.1. Change of Measure

#### C.1.1. ABSOLUTE CONTINUITY

We discuss now a way to test for a lack of absolute continuity and how to split the problem into the part of  $\mathbb{Q}$  that is singular wrt.  $\mathbb{P}$  and the absolute continuous part.

If  $\mathbb{Q} \not\ll \mathbb{P}$  then there is a set on which  $\mathbb{P}$  is zero while  $\mathbb{Q}$  is not and there exists a strictly positive measurable function  $f$  – for example, the characteristic function for that set – for which  $\mathbb{E}_{\mathbb{Q}}f > 0$ , while  $\mathbb{E}_{\mathbb{P}}f = 0$ . Now, we have only control over RKHS functions and not arbitrary measurable functions, but we might consider the point-evaluators  $k(x, \cdot)$  as a form of  $\delta$ -function at  $x$  and test for  $\mathbb{E}_{\mathbb{Q}}k(x, \cdot) > 0$ , while  $\mathbb{E}_{\mathbb{P}}k(x, \cdot) = 0$ . If we consider the empirical version  $\hat{m}_{\mathbb{Q}} = \sum_{i=1}^n k(y_i, \cdot)$  then  $\hat{\mathbb{E}}_{\mathbb{Q}}k(x, \cdot) = \langle \hat{m}_{\mathbb{Q}}, k(x, \cdot) \rangle_k = \sum_{i=1}^n k(y_i, x) > 0$  implies  $k(x, \cdot) \notin \{k(y_i, \cdot)\}_{i=1}^n$ . So we might restrict our test for abs. continuity to the elements  $\{k(y_i, \cdot)\}_{i=1}^n$  of which  $\hat{m}_{\mathbb{Q}}$  is formed. If there is a  $k(y_i, \cdot)$  which is perpendicular to every  $k(x_j, \cdot)$ , where  $\hat{m}_{\mathbb{P}} = \sum_{j=1}^m k(x_j, \cdot)$  then we have a strong indicator that the empirical measures are not absolute continuous.

There are two effects here which might lead us to a wrong conclusion: (1)  $k(y_i, \cdot)$  might take positive and negative values which cancel exactly when averaged over the empirical version of  $\mathbb{P}$ ; (2)  $\hat{\mathbb{E}}_{\mathbb{Q}}k(y_i, \cdot)$  might be 0 despite  $k(y_i, \cdot)$  being an element of the sum defining  $\hat{\mathbb{E}}_{\mathbb{Q}}$ . So if the  $k(y_i, \cdot)$  is a strictly positive function and  $\hat{\mathbb{E}}_{\mathbb{Q}}k(y_i, \cdot) \neq 0$  then we know that for the empirical versions  $\hat{\mathbb{Q}} \not\ll \hat{\mathbb{P}}$  holds.

We can split the sample into two parts, the  $k(y_i, \cdot)$ 's which we just discussed. These reflect the singular part of  $\hat{\mathbb{Q}}$  wrt. to  $\hat{\mathbb{P}}$ . We can use the remaining samples to define  $\hat{\mathbb{Q}}_a$ , i.e. the absolute continuous part and estimate  $\mathbf{R}$  for  $\hat{\mathbb{Q}}_a$  and  $\mathbb{P}$ . One important point is that we do not have guarantees that  $\hat{\mathbb{Q}}_a$  is in a measure theoretic sense absolute continuous as we test only with kernel functions if we can break absolute continuity and not with arbitrary measurable functions, i.e. the above statement is only a necessary condition for absolute continuity and not a sufficient one.

An interesting question is whether this can be turned into a proper test by increasing either the size of the RKHS, for example, by using a universal RKHS, or by making use of a bandwidth parameter which will decrease to 0 in the sample size.

### C.2. Product Integral – Fubini

Integrals or expectations over product spaces  $X \times Y$  are common in many applications. There are two settings that appear to be of broader interest: The case where we associate with  $X$  the RKHS  $\mathcal{H}_X$  and with  $Y$  the RKHS  $\mathcal{H}_Y$ . Now, for  $f \in \mathcal{H}_X, h \in \mathcal{H}_Y$  we like to take expectations over  $f \times h$  with respect to a measure  $\mathbb{P}_{X \times Y}$  on the product space. This case can be addressed with the help of the product RKHS  $\mathcal{H}_X \otimes \mathcal{H}_Y$  that is introduced in [Aronszajn \(1950\)](#)[Sec. 8]. The RKHS  $\mathcal{H}_X \otimes \mathcal{H}_Y$  has the reproducing kernel

$$p(x_1, y_1, x_2, y_2) = k(x_1, x_2)l(y_1, y_2). \quad (8)$$

We denote the RKHS with  $\mathcal{H}_{X \times Y} := \mathcal{H}_X \otimes \mathcal{H}_Y$ .

We have that  $f \times h \in \mathcal{H}_{X \times Y}$  and expectations can be calculated in the usual way by replacing  $m_X$  with a suitable  $m_{X \times Y} \in \mathcal{H}_{X \times Y}$ , i.e. if  $\mathcal{H}_{X \times Y} \subset L^2(X \times Y, \mathbb{P}_{X \times Y})$  and the corresponding expectation operator is bounded on  $\mathcal{H}_{X \times Y}$  then the Riesz theorem guarantees us that such an element exists with which

$$\mathbb{E}_{X \times Y} f \times h = \langle m_{X \times Y}, f \times h \rangle_{X \times Y}.$$

It is often useful to reduce the product integral to two integrals with the help of the Fubini theorem. That is that, under suitable assumptions,  $\mathbb{E}_{X \times Y} g(x, y) = \mathbb{E}_X \mathbb{E}_Y g(x, y)$ .

For expectations over  $g \in \mathcal{H}_X \otimes \mathcal{H}_Y$  we can do something similar. In case that  $g(x, y) = f(x)h(y)$  for suitable  $f \in \mathcal{H}_X, h \in \mathcal{H}_Y$ ,  $f, g, h$  are integrable and we have suitable representer  $m_{X \times Y}, m_X, m_Y$  then the Fubini theorem

guarantees us that

$$\begin{aligned}\langle m_{X \times Y}, g \rangle_{X \times Y} &= \mathbb{E}_{X \times Y} g(x, y) = \mathbb{E}_{X \times Y} f(x) h(y) \\ &= \mathbb{E}_X f \mathbb{E}_Y h = \langle m_X, f \rangle_k \langle m_Y, h \rangle_l.\end{aligned}$$

Note, that not every  $g \in \mathcal{H}_X \otimes \mathcal{H}_Y$  needs to be of this particular form as  $\mathcal{H}_X \otimes \mathcal{H}_Y$  is the completion of the direct product between  $\mathcal{H}_X$  and  $\mathcal{H}_Y$ .

The second case of interest is when you have a kernel on the product space  $X \times Y$  that does not arise from kernels on  $X$  and  $Y$ , i.e. the kernel  $p(x_1, y_1, x_2, y_2)$  has not the form from eq. 8. This approach is also useful to deal with the limit points in  $\mathcal{H}_X \otimes \mathcal{H}_Y$ .

Expectations over elements  $g$  from the corresponding RKHS  $\mathcal{H}_{X \times Y}$  can be taken like in the first case. The more interesting problem is to have a form of the Fubini theorem to turn the product integral into two separate integrals that can be efficiently evaluated using the RKHS framework. To do so we can use a kernel  $k$  on the space  $X$  to define an RKHS  $\mathcal{H}_X$  and we try to approximate the inner integral, i.e. to find an operator  $\mathbf{E} : \mathcal{H}_{X \times Y} \rightarrow \mathcal{H}_X$  such that

$$(\mathbf{E}g)(x) \approx \mathbb{E}_Y g(x, y).$$

The free variables are here  $x$  and  $g$ . Taking the supremum over the unit ball in  $\mathcal{H}_{X \times Y}$  and the average over  $X$  wrt.  $\mathbb{P}_X$  we get

$$\begin{aligned}&\sup_{\|g\|_{X \times Y} \leq 1} \mathbb{E}_X (\mathbb{E}_Y g(x, y) - (\mathbf{E}g)(x))^2 \\ &\sup_{\|g\|_{X \times Y} \leq 1} \mathbb{E}_X (\mathbb{E}_Y \langle g, p(x, y, \cdot, \cdot) - \mathbf{E}^* k(x, \cdot) \rangle_{X \times Y})^2 \\ &\leq \mathbb{E}_{X \times Y} \|p(x, y, \cdot, \cdot) - \mathbf{E}^* k(x, \cdot)\|_{X \times Y}^2.\end{aligned}$$

Using the usual regularised empirical version and  $\mathbf{W}$  from eq. 2 we get the estimate

$$\mathbf{E}g = \sum_{i,j=1}^n g(x_j, y_j) \mathbf{W}_{ij} k(x_i, \cdot).$$

### C.3. Conditional Expectation

The adjoint of the estimate we derived for the conditional expectation in eq. 5 is

$$\mathbf{E}^* f = \sum_{i,j=1}^n \langle f, k(x_i, \cdot) \rangle_k \mathbf{W}_{ij} l(y_j, \cdot),$$

with  $\mathbf{W}$  defined in eq. 2. If we use  $f = k(x, \cdot)$  we get

$$\mathbf{E}^* k(x, \cdot) = \sum_{i,j=1}^n k(x_i, x) \mathbf{W}_{ij} l(y_j, \cdot),$$

which is exactly the estimate  $\mu(x)$  from Grünwälder et al. (2012a)[p. 4] with the vector-valued kernel  $\Gamma(x, x') = k(x, x')\mathbf{I}$ . Furthermore, we have that  $\mathbf{E}[h] = \langle h, \mu(\cdot) \rangle_l$  and because  $\mathbf{E}$  maps to  $\mathcal{H}_X$  we know that  $\langle h, \mu(\cdot) \rangle_l \in \mathcal{H}_X$ .

This is also straight forward from a direct evaluation of  $\mu(x)$  as

$$\langle h, \mu(x) \rangle_l = \sum_{i,j=1}^n k(x_i, x) \mathbf{W}_{ij} h(y_j) = \sum_{i=1}^n \beta_i k(x_i, x),$$

with  $\beta_i = \sum_{j=1}^n \mathbf{W}_{ij} h(y_j)$ .

More generally, one might consider the set  $\mathcal{L} = \{\sum_{i=1}^n k(x_i, \cdot) h_i : n \in \mathbb{N}, x_i \in X, h_i \in \mathcal{H}_Y\}$  which is dense in the vector-valued RKHS  $\mathcal{H}_\Gamma$ . Because, elements  $\mu \in \mathcal{L}$  are finite sums we have that

$$\langle h, \mu(x) \rangle_l = \sum_{i=1}^n k(x_i, \cdot) \langle h, h_i \rangle_l = \sum_{i=1}^n \alpha_i k(x_i, \cdot) \in \mathcal{H}_X$$

where  $\alpha_i = \langle h, h_i \rangle_l$ .

The more difficult question is if for the limit of functions in  $\mathcal{L}$ , i.e. functions  $\mu \in \mathcal{H}_\Gamma$ , it holds that  $\langle h, \mu(\cdot) \rangle_l \in \mathcal{H}_Y$  for every  $h \in \mathcal{H}_Y$ . One might try to show for a Cauchy-sequence  $\{\mu_n\}_{n=1}^\infty$  converging to  $\mu$  in  $\mathcal{H}_\Gamma$  that  $\{\langle h, \mu_n(\cdot) \rangle_l\}_{n=1}^\infty$  is a Cauchy-sequence in  $\mathcal{H}_X$ , i.e. that

$$\|\langle h, \mu_n(\cdot) \rangle_l - \langle h, \mu_m(\cdot) \rangle_l\|_k = \|\langle h, \mu_n(\cdot) - \mu_m(\cdot) \rangle_l\|_k$$

is below a given  $\epsilon$  after some finite number  $N$ . It is not directly obvious how to approach this. One might consider the Cauchy-Schwarz inequality, which tells us that  $|\langle h, \mu_n(\cdot) - \mu_m(\cdot) \rangle_l| \leq \|h\|_l \|\mu_n(\cdot) - \mu_m(\cdot)\|_l$ . Then one might show that  $\|\mu_n(\cdot) - \mu_m(\cdot)\|_l$  is in  $\mathcal{H}_X$  and try to prove that the norm of the upper bound is higher than the norm of the original sequence – this is not directly obvious as norms can measure different properties. In the operator approach these problems do not arise as by construction it is guaranteed that  $\mathbf{E}h \in \mathcal{H}_X$  independent of  $\mathbf{E}$  being a finite sum or a limit point in  $\mathcal{H}_\Xi$ .

## D. Section 4: RKHS Integration Theory: Composite Transformations – Proofs

### D.1. Sum Rule – Change of Measure on $\mathbf{Y}$

**Theorem D.1.** *We assume that the integrability assumptions from suppl. F hold, that  $\mathbb{Q}_X \ll \mathbb{P}_X$  and the corresponding Radon-Nikodým derivative  $r$  is a.e. upper bounded by  $b$  we have with  $c = \|\mathbf{A}^{1/2}\|_{op}^2 \|\mathbf{B}\|_{op}$  that*

$$\mathcal{E}_m[m_Y] \leq b\mathcal{E}_c[\mathbf{E}] + c\|\mathbf{E}\|_\Xi^2 \mathcal{E}_m[m_X].$$

*Proof.* Under our assumptions  $\mathbb{E}_{\mathbb{Q}_X}$  has a representer  $m_{\mathbb{Q}_X} \in \mathcal{H}_X$  due to the Riesz-theorem as each  $f \in \mathcal{H}_X$  is integrable and  $\mathbb{E}_{\mathbb{Q}_X}$  is bounded as  $\mathbb{E}_{\mathbb{Q}_X} f \leq \|f\|_k \sqrt{k(x, x)}$ . Using the transformation in eq. 6, we get

$$\begin{aligned} \mathcal{E}_m[m_Y] &= \sup_{\|h\|_l \leq 1} (\mathbb{E}_{\mathbb{Q}_Y} h - \langle m_Y, h \rangle_l)^2 = \sup_{\|h\|_l \leq 1} (\mathbb{E}_{\mathbb{Q}_X} \mathbb{E}_{\mathbb{P}}[h|x] - \langle m_X, \mathbf{E}h \rangle_k)^2 \\ &= \sup_{\|h\|_l \leq 1} (\mathbb{E}_{\mathbb{Q}_X} \mathbb{E}_{\mathbb{P}}[h|x] - \mathbb{E}_{\mathbb{Q}_X} \mathbf{E}[h] + \mathbb{E}_{\mathbb{Q}_X} \mathbf{E}[h] - \langle m_X, \mathbf{E}h \rangle_k)^2 \\ &\leq \sup_{\|h\|_l \leq 1} \mathbb{E}_{\mathbb{Q}_X} (\mathbb{E}_{\mathbb{P}}[h|x] - \mathbf{E}[h])^2 + \sup_{\|h\|_l \leq 1} (\langle m_{\mathbb{Q}_X} - m_X, \mathbf{E}[h] \rangle_k)^2. \end{aligned}$$

The first term can be transformed in case  $\mathbb{Q}$  is absolute continuous wrt.  $\mathbb{P}$ . Assuming the corresponding Radon-Nikodým derivative  $r(x)$  is a.e. upper bounded by  $b$ , we get:

$$\sup_{\|h\|_l \leq 1} \mathbb{E}_{\mathbb{Q}_X} (\mathbb{E}_{\mathbb{P}}[h|x] - \mathbf{E}[h])^2 = \sup_{\|h\|_l \leq 1} \mathbb{E}_{\mathbb{P}_X} r(x) (\mathbb{E}_{\mathbb{P}}[h|x] - \mathbf{E}[h])^2 \leq b \sup_{\|h\|_l \leq 1} \mathbb{E}_{\mathbb{P}_X} (\mathbb{E}_{\mathbb{P}}[h|x] - \mathbf{E}[h])^2 \leq b\mathcal{E}_c[\mathbf{E}]. \quad (9)$$

Using Micchelli & Pontil (2005)[Prop. 2.1 (f)], the second term can be bounded by

$$\begin{aligned} \sup_{\|h\|_l \leq 1} (\langle m_{\mathbb{Q}_X} - m_X, \mathbf{E}[h] \rangle_k)^2 &\leq \sup_{\|h\|_l \leq 1} \langle m_{\mathbb{Q}_X} - m_X, \frac{\mathbf{E}[h]}{\|\mathbf{E}h\|_k} \rangle_k^2 \|\mathbf{E}h\|_k^2 \\ &\leq \sup_{\|f\|_k \leq 1} \langle m_{\mathbb{Q}_X} - m_X, f \rangle_k^2 \|\mathbf{E}\|_\Xi^2 \sup_{\|h\|_l \leq 1} \|\mathbf{E}(h, h)\|_{op} \leq \mathcal{E}_m[m_X] \|\mathbf{E}\|_\Xi^2 \|\mathbf{A}^{1/2}\|_{op}^2 \sup_{\|h\|_l \leq 1} \|h\|_l^2 \|\mathbf{B}\|_{op} \\ &= c\|\mathbf{E}\|_\Xi^2 \mathcal{E}_m[m_X], \end{aligned}$$

with  $c = \|\mathbf{A}^{1/2}\|_{op}^2 \|\mathbf{B}\|_{op}$ .

In total, we get the upper bound

$$\mathcal{E}_m[m_Y] \leq b\mathcal{E}_c[\mathbf{E}] + c\|\mathbf{E}\|_\Xi^2 \mathcal{E}_m[m_X].$$

□

## D.2. Kernel Bayes' Rule – Change of Measure on $X|y$

In the following we assume that  $d = \sup_{x \in X} k(x, x) < \infty$ ,  $c = \sup_{y \in Y} l(y, y) < \infty$ . For the theorem we use subscripts at the risk functions to denote the measure with which they are evaluated, i.e.  $\mathcal{E}_{c, \mathbb{Q}}$  for the conditional expectation risk evaluated wrt.  $\mathbb{Q}$ . The kernel function is here  $\Xi(h, h') := \langle h, \mathbf{A}h' \rangle_l \mathbf{B}$ .

**Theorem D.2.** *We assume that the integrability assumptions from suppl. F hold, that  $\mathbb{Q}_X \ll \mathbb{P}_X$  and that the corresponding Radon-Nikodým derivative is a.e. upper bounded by  $b$ . Furthermore, we assume that there exists a constant  $q > 0$  such that  $\mathbb{E}_{y' \sim \mathbb{P}_Y} l(y, y') \geq q$  for all  $y \in Y$  and that the approximation error of  $m_Y$  is such that  $|\mathbb{E}_{y' \sim \mathbb{P}_Y} l(y, y') - \langle m_Y, l(y, \cdot) \rangle_l| \leq |\mathbb{E}_{y' \sim \mathbb{P}_Y} l(y, y')|/2$ . We have that*

$$\mathcal{E}_{c, \mathbb{Q}}[\mathbf{G}] \leq d^2 \mathcal{E}_{a, \mathbb{Q}}[l] + \mathcal{E}_{K, \mathbb{Q}}[\mathbf{G}] + \frac{4cd}{q^2} \left( \frac{c^2}{q^2} \left( b \mathcal{E}_{c, \mathbb{P}}[\mathbf{E}] + \|\mathbf{A}^{1/2}\|_{op}^2 \|\mathbf{B}\|_{op} \|\mathbf{E}\|_{\Xi}^2 \mathcal{E}_{m, \mathbb{Q}}[m_X] \right) + b \mathcal{E}_{c, \mathbb{P}}[\mathbf{E}] \right),$$

in other words there exists a positive constant  $C$  such that

$$\mathcal{E}_{c, \mathbb{Q}}[\mathbf{G}] \leq \mathcal{E}_{K, \mathbb{Q}}[\mathbf{G}] + C \left( \mathcal{E}_{a, \mathbb{Q}}[l] + \|\mathbf{E}\|_{\Xi}^2 \mathcal{E}_{m, \mathbb{Q}}[m_X] + \mathcal{E}_{c, \mathbb{P}}[\mathbf{E}] \right).$$

*Proof.* In the following, we use the short form  $\mathbb{E}_{Y'}$  for  $\mathbb{E}_{y' \sim \mathbb{P}_Y}$ .

(a) We follow the chain of arguments from Section 4.2. We use here the measure  $\mathbb{Q}$ . A change of measure is needed at the end to bound the error of  $\mathbf{E}$ . We have that

$$\begin{aligned} \mathcal{E}_{c, \mathbb{Q}}[\mathbf{G}] &= \sup_{\|f\|_k \leq 1} \mathbb{E}_Y (\mathbb{E}[f|y] - \mathbf{G}[f](y))^2 \\ &\leq \sup_{\|f\|_k \leq 1} \mathbb{E}_Y \left( \mathbb{E}[f|y] - \mathbb{E}_{Y'} \frac{l(y, y')}{\mathbb{E}_{Y'} l(y, y')} \mathbb{E}[f|y'] \right)^2 + \sup_{\|f\|_k \leq 1} \mathbb{E}_Y \left( \mathbb{E}_{Y'} \frac{l(y, y')}{\mathbb{E}_{Y'} l(y, y')} \mathbb{E}[f|y'] - \mathbf{G}[f](y) \right)^2 \\ &= d^2 \mathcal{E}_{a, \mathbb{Q}}[l] + \sup_{\|f\|_k \leq 1} \mathbb{E}_Y \left( \frac{1}{\mathbb{E}_{Y'} l(y, y')} \mathbb{E}_X f \mathbb{E}_{Y'} [l(y, y')|x] - \mathbf{G}[f](y) \right)^2 \\ &= d^2 \mathcal{E}_{a, \mathbb{Q}}[l] + \sup_{\|f\|_k \leq 1} \mathbb{E}_Y \left( \frac{1}{\mathbb{E}_{Y'} l(y, y')} \mathbb{E}_X f \mathbb{E}_{Y'} [l(y, y')|x] - \frac{1}{\langle m_Y, l(y, \cdot) \rangle_l} \mathbb{E}_X f \mathbf{E}[l(y, \cdot)](x) \right)^2 \\ &\quad + \sup_{\|f\|_k \leq 1} \mathbb{E}_Y \left( \frac{1}{\langle m_Y, l(y, \cdot) \rangle_l} \mathbb{E}_X f \mathbf{E}[l(y, \cdot)](x) - \mathbf{G}[f](y) \right)^2 \\ &= d^2 \mathcal{E}_{a, \mathbb{Q}}[l] + \sup_{\|f\|_k \leq 1} \mathbb{E}_Y \left( \frac{1}{\mathbb{E}_{Y'} l(y, y')} \mathbb{E}_X f \mathbb{E}_{Y'} [l(y, y')|x] - \frac{1}{\langle m_Y, l(y, \cdot) \rangle_l} \mathbb{E}_X f \mathbf{E}[l(y, \cdot)](x) \right)^2 + \mathcal{E}_{K, \mathbb{Q}}[\mathbf{G}]. \end{aligned}$$

We address the approximation error in (b), we verify in (c) that the integral transformation in the third line is valid and we bound the error of the middle term of the last line in (d), (e) and (f). Finally, the error for  $\mathbf{E}$  can be bound in terms of the error  $\mathcal{E}_{c, \mathbb{P}}[\mathbf{E}]$  wrt. the measure  $\mathbb{P}$  from which we can sample. This is the part where the change of measure is used and the bound on the Radon-Nikodým derivative is needed. We derived the necessary bound already in eq. 9:  $\mathcal{E}_{c, \mathbb{Q}}[\mathbf{E}] \leq b \mathcal{E}_{c, \mathbb{P}}[\mathbf{E}]$ .

(b) We have that

$$\sup_{\|f\|_k \leq 1} \mathbb{E}_Y \left( \mathbb{E}[f|y] - \mathbb{E}_{Y'} \frac{l(y, y')}{\mathbb{E}_{Y'} l(y, y')} \mathbb{E}[f|y'] \right)^2 \leq d^2 \sup_{\|h\|_{L^1(\mathbb{Q}_Y)} \leq 1} \mathbb{E}_Y \left( h(y) - \mathbb{E}_{Y'} \frac{l(y, y')}{\mathbb{E}_{Y'} l(y, y')} h(y') \right)^2 = d^2 \mathcal{E}_{a, \mathbb{Q}}[l].$$

To see this we first observe that the conditional expectation  $\mathbb{E}[f|y]$  is integrable wrt.  $\mathbb{Q}_Y$  and

$$\|\mathbb{E}[f|y]\|_{L^1(\mathbb{Q}_Y)} \leq \mathbb{E}_{\mathbb{Q}_Y} \mathbb{E}[\|f\||y] \leq \sup_{x \in X} |f(x)| \leq \sup_{x \in X} \|f\|_k \sqrt{k(x, x)} \leq d \|f\|_k.$$

Hence, if we take the supremum over all  $\mathbb{Q}_Y$  integrable functions  $h$  with norm  $\|h\|_{L^1(\mathbb{Q}_Y)} \leq d$ , we also include

every  $\mathbb{E}[f|y]$  with  $\|f\|_k = 1$ . Finally, we can pull the scaling outside through

$$\begin{aligned} \sup_{\|h\|_{L^1(\mathbb{Q}_Y)} \leq d} \mathbb{E}_Y \left( h(y) - \mathbb{E}_{Y'} \frac{l(y, y')}{\mathbb{E}_{Y'} l(y, y')} h(y') \right)^2 &= \sup_{\|\frac{h}{d}\|_{L^1(\mathbb{Q}_Y)} \leq 1} \mathbb{E}_Y \left( h(y) - \mathbb{E}_{Y'} \frac{l(y, y')}{\mathbb{E}_{Y'} l(y, y')} h(y') \right)^2 \\ &= \sup_{\|h\|_{L^1(\mathbb{Q}_Y)} \leq 1} d^2 \mathbb{E}_Y \left( h(y) - \mathbb{E}_{Y'} \frac{l(y, y')}{\mathbb{E}_{Y'} l(y, y')} h(y') \right)^2. \end{aligned}$$

(c) The integral transformation  $\mathbb{E}_{Y'} l(y, y') \mathbb{E}[f|y'] = \mathbb{E}_X f \mathbb{E}_{Y'}[l(y, y')|x]$  is easy to verify. We have that  $l(y, \cdot) \in \mathcal{H}_Y$  and by assumption is  $\mathbb{Q}_Y$ -integrable. Similarly,  $f \in \mathcal{H}_X$  is  $\mathbb{Q}_X$ -integrable and, using (Fremmlin, 2001)[253D], we have that  $l(y, \cdot) \otimes f$  is  $\mathbb{Q}_{X \times Y}$ -integrable. Now,  $\mathbb{E}_{X \times Y} l(y, \cdot) \otimes f = \mathbb{E}_{X \times Y} \mathbb{E}[l(y, \cdot) \otimes f|x] = \mathbb{E}_X f \mathbb{E}[l(y, \cdot)|x]$ . With the same argument we have  $\mathbb{E}_{X \times Y} l(y, \cdot) \otimes f = \mathbb{E}_{Y'} l(y, \cdot) \mathbb{E}[f|y']$ .

(d) We have that

$$(\mathbb{E}_X f(x) \mathbb{E}[l(y, \cdot)|x] - \mathbb{E}_X f(x) \mathbf{E}[l(y, \cdot)](x))^2 \leq cd \|f\|_k^2 \mathcal{E}_{c, \mathbb{Q}}[\mathbf{E}].$$

This is essentially due to the Jensen inequality and the fact that  $f^2(x) = |\langle f, k(x, \cdot) \rangle_k|^2 \leq \|f\|_k^2 k(x, x) = d \|f\|_k^2$ :

$$\begin{aligned} (\mathbb{E}_X f(x) \mathbb{E}[l(y, \cdot)|x] - \mathbb{E}_X f(x) \mathbf{E}[l(y, \cdot)](x))^2 &\leq \mathbb{E}_X f^2(x) (\mathbb{E}[l(y, \cdot)|x] - \mathbf{E}[l(y, \cdot)](x))^2 \\ &\leq d \|f\|_k^2 \mathbb{E}_X (\mathbb{E}[l(y, \cdot)|x] - \mathbf{E}[l(y, \cdot)](x))^2 \leq d \|f\|_k^2 l(y, y) \mathcal{E}_{c, \mathbb{Q}}[\mathbf{E}]. \end{aligned}$$

(e) Building up on (d) we get the bound

$$\begin{aligned} &\left( \frac{1}{\mathbb{E}_{Y'} l(y, \cdot)} \mathbb{E}_X f(x) \mathbb{E}[l(y, \cdot)|x] - \frac{1}{\langle m_Y, l(y, \cdot) \rangle_l} \mathbb{E}_X f(x) \mathbf{E}[l(y, \cdot)](x) \right)^2 \\ &\leq \frac{4cd \|f\|_k^2}{|\mathbb{E}_{Y'} l(y, \cdot)|^2} \left( \frac{c^2}{|\mathbb{E}_{Y'} l(y, \cdot)|^2} \mathcal{E}_{m, \mathbb{Q}}[m_Y] + b \mathcal{E}_{c, \mathbb{Q}}[\mathbf{E}] \right). \end{aligned}$$

**P** We first address the quotients. Let us denote for this part  $e := \mathbb{E}_{Y'} l(y, y')$  and  $o = \langle m_Y, l(y, \cdot) \rangle_l$ . We have that

$$\left| \frac{1}{e} - \frac{1}{o} \right| = \frac{|e - o|}{|eo|} = \frac{|e - o|}{|e||e - (e - o)|} \leq \frac{|e - o|}{|e||e| - |e - o|}$$

and  $|e - o|^2 = |\mathbb{E}_{Y'} l(y, \cdot) - \langle m_Y, l(y, \cdot) \rangle_l|^2 = \|l(y, \cdot)\|_l^2 |\mathbb{E}_{Y'} \frac{l(y, \cdot)}{\|l(y, \cdot)\|_l} - \langle m_Y, \frac{l(y, \cdot)}{\|l(y, \cdot)\|_l} \rangle_l|^2 \leq c \mathcal{E}_{m, \mathbb{Q}}[m_Y]$ . Furthermore, using the assumption that  $|e - o| \leq |e|/2$  we get that

$$\left| \frac{1}{e} - \frac{1}{o} \right|^2 \leq \frac{|e - o|^2}{|e|^2 |e| - |e - o|^2} \leq \frac{4|e - o|^2}{|e|^4} \leq \frac{4c \mathcal{E}_{m, \mathbb{Q}}[m_Y]}{|\mathbb{E}_{Y'} l(y, y')|^4}.$$

Next we combine this with (c). We use that  $|o| = |o - e - (-e)| \geq ||o - e| - |e|| \geq \frac{|e|}{2}$  under our assumption and that  $|l(y, y')| \leq c$ . The bound is now

$$\begin{aligned} &\left( \frac{1}{e} \mathbb{E}_X f(x) \mathbb{E}[l(y, \cdot)|x] - \frac{1}{o} \mathbb{E}_X f(x) \mathbf{E}[l(y, \cdot)](x) \right)^2 \\ &\leq (\mathbb{E}_X f(x) \mathbb{E}[l(y, \cdot)|x])^2 \left( \frac{1}{e} - \frac{1}{o} \right)^2 + \frac{1}{o^2} (\mathbb{E}_X f(x) \mathbb{E}[l(y, \cdot)|x] - \mathbb{E}_X f(x) \mathbf{E}[l(y, \cdot)](x))^2 \\ &\leq \|f\|_k^2 dc^2 \left( \frac{1}{e} - \frac{1}{o} \right)^2 + \frac{4}{|e|^2} (\mathbb{E}_X f(x) \mathbb{E}[l(y, \cdot)|x] - \mathbb{E}_X f(x) \mathbf{E}[l(y, \cdot)](x))^2 \\ &\leq \frac{4dc^3}{|\mathbb{E}_{Y'} l(y, y')|^4} \|f\|_k^2 \mathcal{E}_{m, \mathbb{Q}}[m_Y] + \frac{4cd}{|\mathbb{E}_{Y'} l(y, y')|^2} \|f\|_k^2 \mathcal{E}_{c, \mathbb{Q}}[\mathbf{E}] \\ &\leq \frac{4dc^3}{|\mathbb{E}_{Y'} l(y, y')|^4} \|f\|_k^2 \mathcal{E}_{m, \mathbb{Q}}[m_Y] + \frac{4bcd}{|\mathbb{E}_{Y'} l(y, y')|^2} \|f\|_k^2 \mathcal{E}_{c, \mathbb{P}}[\mathbf{E}]. \quad \mathbf{Q} \end{aligned}$$

(f) The final step is to use the sum rule theorem to bound the error  $\mathcal{E}_{m,\mathbb{Q}}[m_y]$  and to take the supremum over  $f$  and integrate wrt.  $\mathbb{E}_Y$ . Under our assumption that  $\mathbb{E}_Y l(y, y') > q$  this turns into

$$\begin{aligned} \sup_{\|f\|_k \leq 1} \mathbb{E}_Y \left( \frac{1}{\mathbb{E}_Y l(y, y')} \mathbb{E}_X f(x) \mathbb{E}[l(y, \cdot)|x] - \frac{1}{\langle m_Y, l(y, \cdot) \rangle_l} \mathbb{E}_X f(x) \mathbb{E}[l(y, \cdot)](x) \right)^2 &\leq \frac{4dc^3}{q^4} \mathcal{E}_{m,\mathbb{Q}}[m_Y] + \frac{4bcd}{q^2} \mathcal{E}_{c,\mathbb{P}}[\mathbf{E}] \\ &\leq \frac{4dc^3}{q^4} \left( b\mathcal{E}_c[\mathbf{E}] + \|\mathbf{A}^{1/2}\|_{op}^2 \|\mathbf{B}\|_{op} \|\mathbf{E}\|_{\Xi}^2 \mathcal{E}_{m,\mathbb{Q}}[m_X] \right) + \frac{4bcd}{q^2} \mathcal{E}_{c,\mathbb{P}}[\mathbf{E}]. \end{aligned}$$

□

## E. Convergence Rates for the approximate sum rule

We use Theorem 4.1 and we bound the involved risk term for the conditional expectation in the following subsections. We follow here the approach in Grünewälder et al. (2012a). This approach is based on vector-valued convergence rates from Caponnetto & De Vito (2007). One of the restrictions of these rates is that they need a finite dimensional space at one point. The next section contains assumptions which are needed to be able to apply the convergence results from Caponnetto & De Vito (2007).

Before we proceed we need to discuss convergence rates for the standard mean estimate  $\mathcal{E}_m[m_X]$ . Convergence rates are known for the convergence of the mean element in the RKHS norm. This implies convergence of the estimate in our risk function  $\mathcal{E}_m$ , but is actually a lot stronger than what we need. The convergence rates are under suitable assumptions in the order of  $O(n^{-\alpha})$  with  $0 < \alpha \leq 1/2$  (see Fukumizu et al. (2011) and references therein). We have rates of the order  $n^{-1}$  for the conditional expectation estimates for our risk function, and one might hypothesize that these rates are also achievable for  $\mathcal{E}_m$ , as conditional expectation estimation is a more difficult task and as our risk function is weaker than the RKHS norm. We do not derive new rates for the mean estimates, but leave it as a parameter in the theorem with an  $\alpha \in ]0, 1]$ . In particular, we assume that for a given measure  $\mathbb{Q}_X$  and for any  $\epsilon > 0$  there exists a constant  $C$  such that

$$\limsup_{n \rightarrow \infty} \mathbb{Q}^n[\mathcal{E}_m[m_X^n] > Cn^{-\alpha}] < \epsilon, \quad (10)$$

holds for any iid sample  $\{x_i\}_{i=1}^n$ . We use here the notation  $m_X^n$  to denote the  $n$ -sample mean estimate and  $\mathbb{Q}^n$  to denote the product measure for  $n$  copies of  $\mathbb{Q}_X$ .

### E.1. Assumptions

We assume that the spaces  $\mathcal{H}_X$  and  $\mathcal{H}_Y$  are finite dimensional. The assumption for  $\mathcal{H}_Y$  is implied by the approach in Caponnetto & De Vito (2007) as there the output space of the regression problem must be finite dimensional. For simplicity we also assume that  $\mathcal{H}_X$  is finite dimensional, however, this assumption can be dropped with some extra effort.

We also assume that the kernel is measurable, that is that for arbitrary  $h, h' \in \mathcal{H}_Y$  that the mapping:  $(f, g) \mapsto \langle h, \Xi(f, g)h' \rangle_Y$  is measurable. Furthermore, we assume that  $\|l(y, \cdot)\|_l^2$  is measurable wrt.  $y$  and in general that the integrability assumptions from F hold.

We need specific assumptions for the conditional expectation estimation problem. For this we assume that a minimiser of the regression problem exists, that is, that there exists a  $\mathbf{E}_s \in \mathcal{H}_{\Xi}$  such that  $\mathcal{E}_s[\mathbf{E}_s] = \inf_{\mathbf{E} \in \mathcal{H}_{\Xi}} \mathcal{E}_s[\mathbf{E}]$ .

### E.2. Rates for the Conditional Expectation

In this section we derive risk bounds and convergence rates for the natural risk function

$$\mathcal{E}_c[\mathbf{E}] = \sup_{\|h\|_l \leq 1} \mathbb{E}_X (\mathbb{E}[h|x] - \mathbf{E}[h](x))^2.$$

The approach we take is to derive convergence rates for the surrogate risk function

$$\mathcal{E}_s[\mathbf{E}] = \mathbb{E}_{X \times Y} \|l(y, \cdot) - \mathbf{E}^* k(x, \cdot)\|_l^2,$$

which can be done by a direct application of vector-valued regression rates and to link the two cost functions. We start by linking the two cost functions in the next.

## E.2.1. RELATING THE RISK FUNCTIONS

We reproduce now Theorem A.2 and A.3 from Grünwälder et al. (2012a) for our setting. The derivation is – modulo minor adaptations – like in Grünwälder et al. (2012a) and we include the proofs mainly for completeness. Also note that the approach is based on a conditional expectation argument as discussed in Supp. A.1.

**Lemma E.1.** *We assume that the integrability assumptions from suppl. F hold. If there exists  $\mathbf{E}_* \in \mathcal{H}_\Xi$  such that for any  $h \in \mathcal{H}_Y$ :  $\mathbb{E}[h|x] = \mathbf{E}_*[h](x)$   $\mathbb{P}_X$ -a.s., then for any  $\mathbf{E} \in \mathcal{H}_\Xi$ :*

- (i)  $\mathbb{E}_{X \times Y} \mathbf{E}_*[l(y, \cdot)](x) = \mathbb{E}_X \|\mathbf{E}_* k(x, \cdot)\|_l^2,$
- (ii)  $\mathbb{E}_{X \times Y} \mathbf{E}[l(y, \cdot)](x) = \mathbb{E}_X \langle \mathbf{E}_* k(x, \cdot), \mathbf{E}^* k(x, \cdot) \rangle_l.$

*Proof.* (i) follows from (ii) by setting  $\mathbf{E} := \mathbf{E}_*$ . Using the assumption (ii) can be derived:

$$\begin{aligned} \mathbb{E}_X \langle \mathbf{E}_* k(x, \cdot), \mathbf{E}^* k(x, \cdot) \rangle_l &= \mathbb{E}_X \langle k(x, \cdot), \mathbf{E}_* \mathbf{E}^* k(x, \cdot) \rangle_l = \mathbb{E}_X \mathbf{E}_* [\mathbf{E}^* k(x, \cdot)](x) \\ &= \mathbb{E}_X \mathbb{E}_Y [\mathbf{E}^* [k(x, \cdot)](y) | x] = \mathbb{E}_{X \times Y} \langle l(y, \cdot), \mathbf{E}^* k(x, \cdot) \rangle_l = \mathbb{E}_{X \times Y} \mathbf{E}[l(y, \cdot)](x). \end{aligned}$$

□

**Theorem E.1.** *If there exists a  $\mathbf{E}_* \in \mathcal{H}_\Xi$  such that for any  $h \in \mathcal{H}_Y$  it holds that  $\mathbb{E}[h|x] = \mathbf{E}_*[h](x)$   $\mathbb{P}_X$ -a.s. then  $\mathbf{E}_*$  is a solution of  $\operatorname{argmin}_{\mathbf{E} \in \mathcal{H}_\Xi} \mathcal{E}_c[\mathbf{E}]$  and  $\operatorname{argmin}_{\mathbf{E} \in \mathcal{H}_\Xi} \mathcal{E}_s[\mathbf{E}]$ . Furthermore, any solution  $\mathbf{E}_o$  of either of the two risk functions fulfills*

$$\mathbf{E}_* k(x, \cdot) = \mathbf{E}_o k(x, \cdot) \quad \mathbb{P}_X\text{-a.s.}$$

*In particular, if  $k$  is continuous and for any open set  $B \neq \emptyset$  it holds that  $\mathbb{P}_X B > 0$  then the minimisers of the two risk functions are equal to  $\mathbf{E}_*$ .*

*Proof.* We start by showing that the right side is minimised by  $\mathbf{E}_*$  using the above lemma. Let  $\mathbf{E}$  be any element in  $\mathcal{H}_\Xi$  then we have

$$\begin{aligned} &\mathbb{E}_{X \times Y} \|\mathbf{E} k(x, \cdot) - \mathbf{E}_* k(x, \cdot)\|_l^2 - \mathbb{E}_{X \times Y} \|\mathbf{E} k(x, \cdot) - \mathbf{E}_* k(x, \cdot)\|_l^2 \\ &= \mathbb{E}_X \|\mathbf{E}^* k(x, \cdot)\|_l^2 - 2\mathbb{E}_{X \times Y} \mathbf{E}[l(y, \cdot)](x) + 2\mathbb{E}_{X \times Y} \mathbf{E}_*[l(y, \cdot)](x) - \mathbb{E}_X \|\mathbf{E}_* k(x, \cdot)\|_l^2 \\ &= \mathbb{E}_X \|\mathbf{E}^* k(x, \cdot)\|_l^2 - 2\mathbb{E}_X \langle \mathbf{E}_* k(x, \cdot), \mathbf{E}^* k(x, \cdot) \rangle_l + \mathbb{E}_X \|\mathbf{E}_* k(x, \cdot)\|_l^2 = \mathbb{E}_X \|\mathbf{E}^* k(x, \cdot) - \mathbf{E}_* k(x, \cdot)\|_l^2 \geq 0. \end{aligned}$$

Hence,  $\mathbf{E}_*$  is a minimiser of the surrogate risk functional. The minimiser is furthermore  $\mathbb{P}_X$ -a.s. unique: Assume there is a second minimiser  $\mathbf{E}_o$  then above calculation shows that

$$0 = \mathbb{E}_{X \times Y} \|\mathbf{E}_o k(x, \cdot) - \mathbf{E}_* k(x, \cdot)\|_l^2 - \mathbb{E}_{X \times Y} \|\mathbf{E}_o k(x, \cdot) - \mathbf{E}_* k(x, \cdot)\|_l^2 = \mathbb{E}_X \|\mathbf{E}_o^* k(x, \cdot) - \mathbf{E}_* k(x, \cdot)\|_l^2.$$

Thus,  $\|\mathbf{E}_o^* k(x, \cdot) - \mathbf{E}_* k(x, \cdot)\|_l = 0$   $\mathbb{P}_X$ -a.s. (Fremlin, 2000)[122Rc], i.e. a measurable set  $M$  with  $\mathbb{P}_X M = 1$  exists such that  $\|\mathbf{E}_o^* k(x, \cdot) - \mathbf{E}_* k(x, \cdot)\|_l = 0$  holds for all  $x \in M$ . As  $\|\cdot\|_l$  is a norm we have that  $\mathbf{E}_o^* k(x, \cdot) = \mathbf{E}_* k(x, \cdot)$   $\mathbb{P}_X$ -a.s. Now, let  $k$  be continuous, let  $\mathbb{P}_X B > 0$  for any open set  $B \neq \emptyset$  then and assume that there exists a point  $x$  such that  $\mathbf{E}_o^* k(x, \cdot) \neq \mathbf{E}_* k(x, \cdot)$ . Now, as  $\mathbf{E}_*$ ,  $\mathbf{E}_o$  and  $k$  are continuous there exists an open set  $B$  around  $x$  such that  $\mathbf{E}_o^* k(x', \cdot) \neq \mathbf{E}_* k(x', \cdot)$  for all  $x' \in B$  and, as  $\mathbb{P} B > 0$ ,  $\mathbf{E}_o^* k(x, \cdot) = \mathbf{E}_* k(x, \cdot)$  does not hold  $\mathbb{P}_X$ -a.s. with contradiction to the above. Now, Theorem 2.2 tells us that  $\mathbf{E}_* = \mathbf{E}_o^*$  and because the adjoint identifies the operators uniquely we have  $\mathbf{E}_* = \mathbf{E}_o$ .

Now, for the minimisers of the natural risk function we first observe that for every  $h \in \mathcal{H}_Y$ ,  $\mathbb{E}_X (\mathbb{E}[h|x] - \mathbf{E}_*[h](x))^2 = 0$  by assumption and  $\mathbf{E}_*$  is a minimiser. Uniqueness can be seen in the following way: Assume there is a second minimiser  $\mathbf{E}_o$  then for all  $h \in \mathcal{H}_Y$  we have

$$\mathbb{E}_X (\langle h, \mathbf{E}_o^* k(x, \cdot) - \mathbf{E}_* k(x, \cdot) \rangle_l)^2 \leq \mathbb{E}_X (\langle h, \mathbf{E}_o^* k(x, \cdot) \rangle_l - \mathbb{E}[h|x])^2 + \mathbb{E}_X (\mathbb{E}[h|x] - \langle h, \mathbf{E}_* k(x, \cdot) \rangle_l)^2 = 0.$$

Hence,  $\langle h, \mathbf{E}_o^* k(x, \cdot) - \mathbf{E}_* k(x, \cdot) \rangle_l = 0$   $\mathbb{P}_X$ -a.s. (Fremlin, 2000)[122Rc], i.e. a measurable set  $M$  with  $\mathbb{P}_X M = 1$  exists such that  $\langle h, \mathbf{E}_o^* k(x, \cdot) - \mathbf{E}_* k(x, \cdot) \rangle_l = 0$  holds for all  $x \in M$ . Assume that there exists a  $x' \in M$  such that  $\mathbf{E}_o^* k(x', \cdot) \neq \mathbf{E}_* k(x', \cdot)$  then pick  $h := \mathbf{E}_o^* k(x', \cdot) - \mathbf{E}_* k(x', \cdot)$  and we have  $0 = \langle h, \mathbf{E}_o^* k(x', \cdot) - \mathbf{E}_* k(x', \cdot) \rangle_l = \|\mathbf{E}_o^* k(x', \cdot) - \mathbf{E}_* k(x', \cdot)\|_l > 0$  as  $\|\cdot\|_l$  is a norm. By contradiction we get,  $\mathbf{E}_o^* k(x, \cdot) = \mathbf{E}_* k(x, \cdot)$   $\mathbb{P}_X$ -a.s. With the same argument as in case one we can follow equivalence of the operators. □

The next theorem is the main theorem. It allows us to use convergence rates of the surrogate risk to infer convergence rates for the natural risk. Furthermore, it weakens the assumptions. The price we have to pay for this is an approximation error term.

**Theorem E.2.** *Let  $C = \|\mathbf{A}^{1/2}\|_{op}\|\mathbf{B}\|_{op}^{1/2} \sup_{x \in X} \sqrt{k(x, x)}$  and assume that there exists an  $\eta > 0$  and  $\mathbf{E}_* \in \mathcal{H}_{\Xi}$  such that  $\sup_{\|\mathbf{E}\|_{\Xi} \leq 1} \mathbb{E}_X [\mathbb{E}[\mathbf{E}^*k(x, \cdot)|x] - \langle \mathbf{E}^*k(x, \cdot), \mathbf{E}_*^*k(x, \cdot) \rangle_l]^2 = \eta < \infty$ . Furthermore, let  $\mathbf{E}_s$  be a minimiser of the surrogate risk and let  $\mathbf{E}_o$  be an arbitrary element in  $\mathcal{H}_{\Xi}$ . With  $\mathcal{E}_s[\mathbf{E}_o] \leq \mathcal{E}_s[\mathbf{E}_s] + \delta$  we have*

$$(i) \quad \mathcal{E}_c[\mathbf{E}_s] \leq \left( \sqrt{\mathcal{E}_c[\mathbf{E}_*]} + \eta^{1/4} \sqrt{8C(\|\mathbf{E}_*\|_{\Xi} + \|\mathbf{E}_s\|_{\Xi})} \right)^2,$$

$$(ii) \quad \mathcal{E}_c[\mathbf{E}_o] \leq \left( \sqrt{\mathcal{E}_c[\mathbf{E}_*]} + \eta^{1/4} \sqrt{8C(\|\mathbf{E}_*\|_{\Xi} + \|\mathbf{E}_o\|_{\Xi})} + \delta^{1/2} \right)^2.$$

*Proof.* First, observe that if  $\mathbf{E} \in \mathcal{H}_{\Xi}$  then we have due to the Jensen inequality

$$\begin{aligned} |\mathbb{E}_X \mathbb{E}[\mathbf{E}^*k(x, \cdot)|x] - \mathbb{E}_X \langle \mathbf{E}^*k(x, \cdot), \mathbf{E}_*^*k(x, \cdot) \rangle_l| &\leq \|\mathbf{E}^*k(x, \cdot)\|_l \mathbb{E}_X \left| \mathbb{E} \left[ \frac{\mathbf{E}^*k(x, \cdot)}{\|\mathbf{E}^*k(x, \cdot)\|_l} \middle| x \right] - \left\langle \frac{\mathbf{E}^*k(x, \cdot)}{\|\mathbf{E}^*k(x, \cdot)\|_l}, \mathbf{E}_*^*k(x, \cdot) \right\rangle_l \right| \\ &\leq \|\mathbf{E}^*k(x, \cdot)\|_l \sqrt{\mathbb{E}_X \left( \mathbb{E} \left[ \frac{\mathbf{E}^*k(x, \cdot)}{\|\mathbf{E}^*k(x, \cdot)\|_l} \middle| x \right] - \left\langle \frac{\mathbf{E}^*k(x, \cdot)}{\|\mathbf{E}^*k(x, \cdot)\|_l}, \mathbf{E}_*^*k(x, \cdot) \right\rangle_l \right)^2} = \|\mathbf{E}^*k(x, \cdot)\|_l \sqrt{\eta}. \end{aligned}$$

We can now reproduce the proof of Lemma E.1 with an approximation error. For any  $\mathbf{E} \in \mathcal{H}_{\Xi}$  we have

$$\begin{aligned} |\mathbb{E}_X \langle \mathbf{E}^*k(x, \cdot), \mathbf{E}_*^*k(x, \cdot) \rangle_l - \mathbb{E}_{X \times Y} \langle l(y, \cdot), \mathbf{E}^*k(x, \cdot) \rangle_l| \\ = |\mathbb{E}_X \langle \mathbf{E}^*k(x, \cdot), \mathbf{E}_*^*k(x, \cdot) \rangle_l - \mathbb{E}_X \mathbb{E}[\mathbf{E}^*k(x, \cdot)|x]| \leq \|\mathbf{E}^*k(x, \cdot)\|_l \sqrt{\eta}. \end{aligned}$$

In particular,

$$|\mathbb{E}_{X \times Y} \langle l(y, \cdot), \mathbf{E}_*^*k(x, \cdot) \rangle_l - \mathbb{E}_{X \times Y} \|\mathbf{E}_*^*k(x, \cdot)\|_l^2| \leq \|\mathbf{E}_*^*k(x, \cdot)\|_l \sqrt{\eta}.$$

Like in the proof of Theorem E.1 we have for any  $\mathbf{E}$  that

$$\begin{aligned} \mathcal{E}_s[\mathbf{E}] - \mathcal{E}_s[\mathbf{E}_*] &= \mathbb{E}_{X \times Y} \|\mathbf{E}^*k(x, \cdot) - \mathbf{E}_*^*k(x, \cdot)\|_l^2 - \mathbb{E}_{X \times Y} \|\mathbf{E}_*^*k(x, \cdot)\|_l^2 \\ &\geq \mathbb{E}_X \|\mathbf{E}^*k(x, \cdot)\|_l^2 - 2\mathbb{E}_X \langle \mathbf{E}_*^*k(x, \cdot), \mathbf{E}^*k(x, \cdot) \rangle_l + \mathbb{E}_X \|\mathbf{E}_*^*k(x, \cdot)\|_l^2 - 2\|\mathbf{E}_*^*k(x, \cdot)\|_l \sqrt{\eta} - 2\|\mathbf{E}^*k(x, \cdot)\|_l \sqrt{\eta} \\ &= \mathbb{E}_X \|\mathbf{E}_*^*k(x, \cdot) - \mathbf{E}^*k(x, \cdot)\|_l^2 - 2\sqrt{\eta}(\|\mathbf{E}_*^*k(x, \cdot)\|_l + \|\mathbf{E}^*k(x, \cdot)\|_l). \end{aligned} \quad (11)$$

In particular,  $|\mathcal{E}_s[\mathbf{E}] - \mathcal{E}_s[\mathbf{E}_*]| \geq \mathcal{E}_s[\mathbf{E}] - \mathcal{E}_s[\mathbf{E}_*] \geq \mathbb{E}_X \|\mathbf{E}_*^*k(x, \cdot) - \mathbf{E}^*k(x, \cdot)\|_l^2 - 2\sqrt{\eta}(\|\mathbf{E}_*^*k(x, \cdot)\|_l + \|\mathbf{E}^*k(x, \cdot)\|_l)$  and hence

$$\mathbb{E}_X \|\mathbf{E}_*^*k(x, \cdot) - \mathbf{E}^*k(x, \cdot)\|_l^2 \leq |\mathcal{E}_s[\mathbf{E}] - \mathcal{E}_s[\mathbf{E}_*]| + 2\sqrt{\eta}(\|\mathbf{E}_*^*k(x, \cdot)\|_l + \|\mathbf{E}^*k(x, \cdot)\|_l). \quad (12)$$

We can now bound the error  $\mathcal{E}_c[\mathbf{E}]$  in dependence of how similar  $\mathbf{E}$  is to  $\mathbf{E}_*$  in the surrogate cost function  $\mathcal{E}_s$ :

$$\begin{aligned} \sqrt{\mathcal{E}_c[\mathbf{E}]} &\leq \sqrt{\mathcal{E}_c[\mathbf{E}_*]} + \sup_{\|h\|_l \leq 1} \sqrt{\mathbb{E}_X [\langle h, \mathbf{E}_*^*k(x, \cdot) - \mathbf{E}^*k(x, \cdot) \rangle_l]^2} \leq \sqrt{\mathcal{E}_c[\mathbf{E}_*]} + \sqrt{\mathbb{E}_X \left( \frac{\|\mathbf{E}_*^*k(x, \cdot) - \mathbf{E}^*k(x, \cdot)\|_l^2}{\|\mathbf{E}_*^*k(x, \cdot) - \mathbf{E}^*k(x, \cdot)\|_l} \right)^2} \\ &\leq \sqrt{\mathcal{E}_c[\mathbf{E}_*]} + \eta^{1/4} \sqrt{2(\|\mathbf{E}_*^*k(x, \cdot)\|_l + \|\mathbf{E}^*k(x, \cdot)\|_l)} + \sqrt{|\mathcal{E}_s[\mathbf{E}] - \mathcal{E}_s[\mathbf{E}_*]|}, \end{aligned} \quad (13)$$

where we used the triangular inequality, we used that  $\langle \frac{\mathbf{E}_*^*k(x, \cdot) - \mathbf{E}^*k(x, \cdot)}{\|\mathbf{E}_*^*k(x, \cdot) - \mathbf{E}^*k(x, \cdot)\|_l}, \mathbf{E}_*^*k(x, \cdot) - \mathbf{E}^*k(x, \cdot) \rangle_l \geq \langle h, \mathbf{E}_*^*k(x, \cdot) - \mathbf{E}^*k(x, \cdot) \rangle_l$  for any  $h$  with  $\|h\|_l \leq 1$  and eq. 12.

Now, for  $\mathbf{E} := \mathbf{E}_s$  observe that  $\mathcal{E}_s[\mathbf{E}_s] + 2\sqrt{\eta}(\|\mathbf{E}_*^*k(x, \cdot)\|_l + \|\mathbf{E}_s^*k(x, \cdot)\|_l) \geq \mathcal{E}_s[\mathbf{E}_*]$  follows from eq. (11) and as  $\mathbf{E}_s$  is a  $\mathcal{E}_s$  minimiser we have  $|\mathcal{E}_s[\mathbf{E}_*] - \mathcal{E}_s[\mathbf{E}_s]| \leq 2\sqrt{\eta}(\|\mathbf{E}_*^*k(x, \cdot)\|_l + \|\mathbf{E}_s^*k(x, \cdot)\|_l)$  and from eq. 13 we get

$$\sqrt{\mathcal{E}_c[\mathbf{E}_s]} \leq \sqrt{\mathcal{E}_c[\mathbf{E}_*]} + \eta^{1/4} \sqrt{8(\|\mathbf{E}_*^*k(x, \cdot)\|_l + \|\mathbf{E}_s^*k(x, \cdot)\|_l)}.$$

Furthermore, with  $\|\mathbf{E}^*k(x, \cdot)\|_l \leq \|\mathbf{E}\|_{\Xi} \|\mathbf{A}^{1/2}\|_{op} \|\mathbf{B}\|_{op}^{1/2} \sqrt{k(x, x)}$  we have

$$\sqrt{\mathcal{E}_c[\mathbf{E}_s]} \leq \sqrt{\mathcal{E}_c[\mathbf{E}_*]} + \eta^{1/4} \sqrt{8C(\|\mathbf{E}_*\|_{\Xi} + \|\mathbf{E}_s\|_{\Xi})}.$$

Similarly, for  $\mathbf{E} := \mathbf{E}_o$  we have

$$\sqrt{\mathcal{E}_c[\mathbf{E}_o]} \leq \sqrt{\mathcal{E}_c[\mathbf{E}_*]} + \eta^{1/4} \sqrt{8C(\|\mathbf{E}_*\|_{\Xi} + \|\mathbf{E}_o\|_{\Xi})} + \delta^{1/2}.$$

□

## E.2.2. CONVERGENCE RATES FOR THE SURROGATE RISK

The surrogate risk is a standard vector-valued risk function for which convergence rates are known under certain assumptions (Caponnetto & De Vito, 2007). This was used in Grünewälder et al. (2012a) to derive rates for conditional expectation estimates. We can do the same in our setting. With the  $n$ -sample estimate being denoted with  $\mathbf{E}_n$  we have:

**Theorem E.3.** *Under assumptions E.1 we have that for every  $\epsilon > 0$  there exists a constant  $C$  such that*

$$\limsup_{n \rightarrow \infty} \sup_{\mathbb{P} \in \mathfrak{P}} \mathbb{P}^n [\mathcal{E}_s[\mathbf{E}_n] - \mathcal{E}_s[\mathbf{E}_s] > Cn^{-1}] < \epsilon.$$

*Proof.* We only need to verify the assumptions in Caponnetto & De Vito (2007) to apply Theorem 2 from the same paper. Most of the verifications below are generic, however, there is one important point. The input space for the regression problem needs to be bounded in a suitable sense. If we use the full space  $\mathcal{H}_X$  here then this is obviously not bounded. However, for the conditional expectation estimate we do not observe arbitrary  $\mathcal{H}_X$  functions, but only functions  $k(x, \cdot)$  and, due to our assumptions,  $k(x, \cdot)$  is bounded. We hence use a bounded and closed ball  $B_X \subset \mathcal{H}_X$ , which contains all  $k(x, \cdot)$ , as the input space.

(a) The first assumption concerns the space  $B_X$ .  $B_X$  must be a Polish space, that is a separable completely metrizable topological space.  $\mathcal{H}_X$  is finite dimensional, hence separable and a Polish space and  $B_X$  as a closed subset is too.

(b)  $\mathcal{H}_Y$  must be a separable Hilbert space. Like in (a) this is fulfilled.

We continue with *Hypothesis 1* from Caponnetto & De Vito (2007).

(c) The space  $\mathcal{H}_{\Xi}$  is separable. **P** Let  $\{e_i\}_{i=1}^n$  be a basis of  $\mathcal{H}_X$  and  $\{g_i\}_{i=1}^m$  be a basis of  $\mathcal{H}_Y$ . Now, for any  $N \in \mathbb{N}$  we have that

$$\sum_{t=1}^N \langle \cdot, \mathbf{A} f_t \rangle_k \mathbf{B} h_t = \sum_{t=1}^N \langle \cdot, \mathbf{A} \sum_{i=1}^n a_{it} e_i \rangle_k \mathbf{B} \sum_{j=1}^m b_{jt} g_j = \sum_{i=1}^n \sum_{j=1}^m \langle \cdot, \mathbf{A} e_i \rangle_k \mathbf{B} g_j \left( \sum_{t=1}^N a_{it} b_{jt} \right) = \sum_{i=1}^n \sum_{j=1}^m c_{ij} \langle \cdot, \mathbf{e}_i \rangle_k \mathbf{g}_j,$$

where  $f_t = \sum_{i=1}^n a_{it} e_i$ ,  $h_t = \sum_{j=1}^m b_{jt} g_j$ ,  $\mathbf{e}_i = \mathbf{A} e_i$ ,  $\mathbf{g}_j = \mathbf{B} g_j$  and  $c_{ij} = \sum_{t=1}^N a_{it} b_{jt} \in \mathbb{R}$ .

We have for two such finite sums  $\mathbf{F} = \sum_{i=1}^n \sum_{j=1}^m c_{ij} \langle \cdot, \mathbf{e}_i \rangle_k \mathbf{g}_j$ ,  $\mathbf{G} = \sum_{i=1}^n \sum_{j=1}^m d_{ij} \langle \cdot, \mathbf{e}_i \rangle_k \mathbf{g}_j \in \mathcal{H}_{\Xi}$  that

$$\|\mathbf{F} - \mathbf{G}\|_{\Xi} = \left\| \sum_{i=1}^n \sum_{j=1}^m (c_{ij} - d_{ij}) \langle \cdot, \mathbf{e}_i \rangle_k \mathbf{g}_j \right\|_{\Xi} \leq \sum_{i=1}^n \sum_{j=1}^m \|\langle \cdot, \mathbf{e}_i \rangle_k \mathbf{g}_j\|_{\Xi} |c_{ij} - d_{ij}| = \sum_{i=1}^n \sum_{j=1}^m w_{ij} |c_{ij} - d_{ij}|$$

with  $w_{ij} = \|\langle \cdot, \mathbf{e}_i \rangle_k \mathbf{g}_j\|_{\Xi} \geq 0$ . Now  $|\sum_{i=1}^n \sum_{j=1}^m w_{ij} |c_{ij} - d_{ij}|| \leq \max_{i,j} w_{ij} \sum_{i=1}^n \sum_{j=1}^m |c_{ij} - d_{ij}|$  and we can use a countable cover of  $\mathbb{R}^{nm}$  to approximate arbitrary operators represented as finite sums. As these operators are dense in  $\mathcal{H}_{\Xi}$  we also gain a countable cover for  $\mathcal{H}_{\Xi}$  and  $\mathcal{H}_{\Xi}$  is separable. **Q** Restricting to  $B_X$  instead of  $\mathcal{H}_X$  does not change the argument.

(d) The next assumption concerns point evaluation. There exists for every  $f \in B_X \subset \mathcal{H}_X$  an operator  $(\Xi_f)^* : \mathcal{H}_{\Xi} \rightarrow \mathcal{H}_Y$  such that for any  $\mathbf{F} \in \mathcal{H}_{\Xi}$  it holds that  $\mathbf{F} f = (\Xi_f)^* \mathbf{F}$ . This operator is the adjoint of the operator  $\Xi_f$  that we defined in Section 2.4. We have that this operator  $(\Xi_f)^*$  is a Hilbert-Schmidt operator. **P** We have that  $(\Xi_f)^*$  is a Hilbert-Schmidt operator if  $\Xi_f$  is and in this case both have the same Hilbert-Schmidt norm which is for a given basis  $\{e_i\}_{i=1}^m$  of  $\mathcal{H}_Y$

$$\sum_{i=1}^m \|\Xi_f e_i\|_{\Xi}^2 = \sum_{i=1}^m \langle e_i, \Xi(f, f) e_i \rangle_l = \langle f, \mathbf{A} f \rangle_k \sum_{i=1}^m \langle e_i, \mathbf{B} e_i \rangle_l$$

finite as  $\mathbf{A}$  and  $\mathbf{B}$  are bounded. Hence, both operators are Hilbert-Schmidt operators. **Q**

(e) The trace of  $(\Xi_f)^* \Xi_f$  must have a common upper bound for all  $f \in B_X$ . This is the point where we need the boundedness assumption of  $k(x, \cdot)$ . For a basis  $\{e_i\}_{i=1}^m$  of  $\mathcal{H}_Y$  we have that

$$\text{Tr}[(\Xi_f)^* \Xi_f] = \sum_{i=1}^m \langle \Xi_f e_i, \Xi_f e_i \rangle_l = \sum_{i=1}^m \langle e_i, \Xi(f, f) e_i \rangle_l \leq \|\mathbf{A}^{1/2} f\|_k^2 \sum_{i=1}^m \langle e_i, \mathbf{B} e_i \rangle_l$$

which is bounded as  $f$  is bounded.

The final assumptions we need to verify are the ones in *Hypothesis 2* from [Caponnetto & De Vito \(2007\)](#).

(f) The output data for this regression problem is concentrated on the set  $\{l(y, \cdot) : y \in Y\}$  for which we have  $\|l(y, \cdot)\|_l^2 = l(y, y) < \infty$ , and, as by assumption  $\|l(y, \cdot)\|_l^2$  is measurable we have that  $\|l(y, \cdot)\|_l^2$  is integrable.

(g) The final assumption concerns the conditional distribution  $\mathbb{P}_{Y|x}$ . We have  $\|l(y, \cdot) - \mathbf{E}_s^*[k(x, \cdot)]\|_l \leq \sqrt{l(y, y)} + \|\mathbf{E}_s^*[k(x, \cdot)]\|_l \leq \sqrt{l(y, y)} + C\|k(x, \cdot)\|_k = \sqrt{l(y, y)} + C\sqrt{k(x, x)}$  with a constant  $C$  as  $\mathbf{E}_s^*$  is a bounded operator. This norm is hence bounded by assumption that the kernels are bounded. As we assumed also that all our  $\mathcal{H}_X$  and  $\mathcal{H}_Y$  functions are integrable we have that the following expectation is well defined

$$\mathbb{E}_{Y|x} [\exp \|l(y, \cdot) - \mathbf{E}_s^*[k(x, \cdot)]\|_l - \|l(y, \cdot) - \mathbf{E}_s^*[k(x, \cdot)]\|_l - 1]$$

and bounded. This implies Assumption 9 in [Caponnetto & De Vito \(2007\)](#) as our observations are concentrated on  $\{l(y, \cdot) : y \in Y\}$ .  $\square$

### E.2.3. CONVERGENCE RATES FOR THE NATURAL RISK

We now combine the upper bound argument with the convergence rate for the upper bound.

**Theorem E.4.** *Let  $C = \|\mathbf{A}^{1/2}\|_{op} \|\mathbf{B}\|_{op}^{1/2} \sup_{x \in X} \sqrt{k(x, x)}$  and assume that there exists an  $\eta > 0$  and  $\mathbf{E}_* \in \mathcal{H}_{\Xi}$  such that  $\sup_{\|\mathbf{E}\|_{\Xi} \leq 1} \mathbb{E}_X [\mathbb{E}[\mathbf{E}^*k(x, \cdot)|x] - \langle \mathbf{E}^*k(x, \cdot), \mathbf{E}_*k(x, \cdot) \rangle_l]^2 = \eta < \infty$ . Under assumptions E.1 we have that for every  $\epsilon > 0$  there exists a constant  $D$  such that*

$$\limsup_{n \rightarrow \infty} \sup_{\mathbb{P} \in \mathfrak{P}} \mathbb{P}^n \left[ \mathcal{E}_c[\mathbf{E}_n] > \left( \sqrt{\mathcal{E}_c[\mathbf{E}_*]} + \eta^{1/4} \sqrt{8C(\|\mathbf{E}_*\|_{\Xi} + \|\mathbf{E}_n\|_{\Xi})} + Dn^{-1/2} \right)^2 \right] < \epsilon.$$

The theorem tells us that we essentially have a rate of  $n^{-1}$  up to an approximation error which we suffer if we can not represent the conditional expectation exactly with our RKHS  $\mathcal{H}_{\Xi}$ .

Also note that the term  $\mathcal{E}_c[\mathbf{E}_*]$  is closely related to  $\eta$ . So if we can represent the true conditional expectation then both  $\eta$  and  $\mathcal{E}_c[\mathbf{E}_*]$  will be 0 and we have a  $O(n^{-1})$  convergence to the true conditional expectation.

### E.2.4. CONVERGENCE RATES FOR THE APPROXIMATE SUM RULE

We can apply these rates now directly to the approximate sum rule with the help of Theorem 4.1. The theorem uses a mean estimate together with an estimate for the conditional expectation. We therefore need samples from  $\mathbb{Q}_X$  and  $\mathbb{P}_{X \times Y}$ . We use the notation  $\mathbb{Q} \otimes \mathbb{P}$  to denote the product measure over  $X \times (X \times Y)$  and  $(\mathbb{Q} \otimes \mathbb{P})^n$  denotes the product measure over  $n$  samples, whereas we assume that all the samples are iid.

**Theorem E.5.** *Let  $C = \|\mathbf{A}^{1/2}\|_{op} \|\mathbf{B}\|_{op}^{1/2} \sup_{x \in X} \sqrt{k(x, x)}$  and assume that there exists an  $\eta > 0$  and  $\mathbf{E}_* \in \mathcal{H}_{\Xi}$  such that  $\sup_{\|\mathbf{E}\|_{\Xi} \leq 1} \mathbb{E}_X [\mathbb{E}[\mathbf{E}^*k(x, \cdot)|x] - \langle \mathbf{E}^*k(x, \cdot), \mathbf{E}_*k(x, \cdot) \rangle_l]^2 = \eta < \infty$ . Furthermore, assume the mean estimate  $m_X^n$  fulfills eq. 10 with an  $\alpha \in ]0, 1]$ . Under assumptions E.1 and if  $\mathbb{Q}_X \ll \mathbb{P}_X$  with a Radon-Nikodým derivative that is a.e. upper bounded by  $b$  we have that for every  $\epsilon > 0$  exist constants  $A$  and  $D$  such that*

$$\limsup_{n \rightarrow \infty} \sup_{\mathbb{P} \in \mathfrak{P}} (\mathbb{P} \otimes \mathbb{Q})^n \left[ \mathcal{E}_m[m_Y^n] > b \left( \sqrt{\mathcal{E}_c[\mathbf{E}_*]} + \eta^{1/4} \sqrt{8C(\|\mathbf{E}_*\|_{\Xi} + \|\mathbf{E}_n\|_{\Xi})} + Dn^{-1/2} \right)^2 + A\|\mathbf{E}_n\|_{\Xi}^2 n^{-\alpha} \right] < \epsilon.$$

We restate the theorem in a more readable form. For this we combine the approximation error terms:

$$\mathcal{E}_A[\mathbf{E}_*] := \max\{\sqrt{\mathcal{E}_c[\mathbf{E}_*]}, \eta^{1/4}\}$$

and we simplify the theorem to:

**Theorem E.6.** *Let  $\mathbf{E}_*$  be a minimiser of the approximation error  $\mathcal{E}_A$ . Under assumptions E.1 and if  $\mathbb{Q}_X \ll \mathbb{P}_X$  with a bounded Radon-Nikodým derivative we have that for every  $\epsilon > 0$  exist constants  $a, b, c, d$  such that*

$$\limsup_{n \rightarrow \infty} \sup_{\mathbb{P} \in \mathfrak{P}} (\mathbb{P} \otimes \mathbb{Q})^n \left[ \mathcal{E}_m[m_Y^n] > \left( \mathcal{E}_A[\mathbf{E}_*](1 + \sqrt{a + b\|\mathbf{E}_n\|_{\Xi}}) + cn^{-1/2} \right)^2 + d\|\mathbf{E}_n\|_{\Xi}^2 n^{-\alpha} \right] < \epsilon.$$

## F. Measure & Integration Assumptions

In this paper we have essentially three different sorts of expectation operations: Expectations over functions  $f \in \mathcal{H}_X$  on a space  $X$ , expectations over functions  $g \in \mathcal{H}_{X \times Y}$  on product spaces  $X \times Y$  and conditional expectations of functions  $h \in \mathcal{H}_Y$  given a  $x \in X$ . We use Lebesgue integrals based on [Fremlin \(2000\)](#).

For the simple expectation  $\mathbb{E}f$  we assume that all  $f \in \mathcal{H}_X$  are integrable wrt. the corresponding probability measure  $\mathbb{P}$  on  $X$ . This is not a very restrictive assumption and most kernels one will consider in practice will imply this assumption (see also [Berlinet & Thomas-Agnan \(2004\)](#)).

Expectations over product spaces are similar. Given two measure spaces  $(X, \Sigma, \mathbb{P}_X)$  and  $(Y, \mathcal{T}, \mathbb{P}_Y)$  we use the product measure  $(X \times Y, \Lambda, \mathbb{P}_{X \times Y})$  from [Fremlin \(2001\)](#)[Def. 251A]. For this product measure we have that  $\Sigma \hat{\otimes} \mathcal{T} \subset \Lambda$  and for  $E \in \Sigma, F \in \mathcal{T}$  we have that  $\mathbb{P}_{X \times Y}(E \times F) = \mathbb{P}_X(E)\mathbb{P}_Y(F)$ . In the cases where we have RKHS functions on the product space we assume that these functions are integrable wrt.  $\mathbb{P}_{X \times Y}$ .

The important theorem for product integrals is the Fubini theorem ([Fremlin, 2000](#))[Thm. 252B] which guarantees us that for  $\mathbb{P}_{X \times Y}$ -integrable functions  $g$  the function  $\mathbb{E}_Y g(x, y)$  is  $\mathbb{P}_X$ -integrable and  $\mathbb{E}_{X \times Y} g = \mathbb{E}_X \mathbb{E}_Y g(x, y)$ .

The final object of interest is the conditional expectation  $\mathbb{E}[h|x]$ . There are multiple ways to deal with conditioning. The easiest case is where we have densities  $p(x, y)$  and  $p(x)$  wrt. Lebesgue-measure for  $\mathbb{P}_{X \times Y}$  and  $\mathbb{P}_X$ . We can then define a conditional expectation

$$\mathbb{E}[h|x] := \int h(y) \frac{p(x, y)}{p(x)} \mathbb{P}_Y(dy)$$

interpreting  $0/0$  as  $0$ . Densities are only defined up to a set of zero measure and, hence, also this conditional expectation is only unique up to a  $\mathbb{P}_X$  zero measure set. If such densities exist and if these are integrable wrt. the relevant measure then the Fubini theorem guarantees us that  $\int h(y)p(x, y)\mathbb{P}_Y(dy)$  is  $\mathbb{P}_X$ -integrable and also that  $\int h(y) \frac{p(x, y)}{p(x)} \mathbb{P}_Y(dy)$  is  $\mathbb{P}_X$ -integrable.

For simplicity we assume that we have such a conditional expectation, however, the density assumption is not crucial and can be avoided by working with general conditional expectations as in [Fremlin \(2001\)](#)[chp. 233].
